# TITLE

Systematic identification of molecular mediators underlying sensing of *Staphylococcus aureus* by *Pseudomonas aeruginosa*

# AUTHORS

Tiffany M. Zarrella<sup>1, 2</sup> and Anupama Khare<sup>1, #</sup>

<sup>1</sup>Laboratory of Molecular Biology, Center for Cancer Research, National Cancer Institute, National Institutes of Health, Bethesda, MD, USA

<sup>2</sup>Postdoctoral Research Associate Program, National Institute of General Medical Sciences, National Institutes of Health, Bethesda, MD, USA

#Address correspondence to [anupama.khare@nih.gov](mailto:anupama.khare@nih.gov)

Running head: Sensing of *Staphylococcus aureus* by *Pseudomonas aeruginosa*

Key words: *Pseudomonas aeruginosa*, *Staphylococcus aureus*, interspecies sensing, staphylopin, zinc competition, intermediate metabolite, citrate, polymicrobial

The authors declare no conflict of interest.

## ABSTRACT

Bacteria typically exist in dynamic, multispecies communities where polymicrobial interactions influence fitness. Elucidating the molecular mechanisms underlying these interactions is critical for understanding and modulating bacterial behavior in natural environments. While bacterial responses to foreign species are frequently characterized at the molecular and phenotypic level, the exogenous molecules that elicit these responses are understudied. Here we outline a systematic strategy based on transcriptomics combined with genetic and biochemical screens of promoter-reporters to identify the molecules from one species that are sensed by another. We utilized this method to study interactions between the pathogens *Pseudomonas aeruginosa* and *Staphylococcus aureus* that are frequently found in co-infections. We discovered that *P. aeruginosa* senses diverse staphylococcal exoproducts including the metallophore staphylopin, intermediate metabolites citrate and acetoin, and multiple molecules that modulate its iron starvation response. Further, we show that staphylopin inhibits biofilm formation and that *P. aeruginosa* can utilize citrate and acetoin for growth, revealing that these interactions have both antagonistic and beneficial effects. Our screening approach thus identified multiple *S. aureus* secreted molecules that are sensed by *P. aeruginosa* and affect its physiology, demonstrating the efficacy of this approach, and yielding new insight into the molecular basis of interactions between these two species.

## INTRODUCTION

Bacteria frequently exist in multispecies communities in which cooperative and competitive interactions govern community composition and physiological outputs. Interactions among pathogenic bacterial species in multispecies infections can affect disease outcomes and antibiotic susceptibility (1, 2). Elucidating the molecules underlying these interactions is therefore critical to understand and modulate bacterial behavior in communities, and pairwise interaction studies using unbiased genetic and biochemical approaches are powerful tools for such analyses (3-5).

Previous studies on pairwise interspecies interactions have focused on the identification of molecules produced by one species and the effect of these molecules on specific phenotypes of another species, such as growth, biofilm formation, or antibiotic resistance (6-11). Recent work has described the genome-wide response of one species to another at the molecular level using either transcriptomics, proteomics, or metabolomics in multispecies conditions, revealing that these responses can be complex and affect numerous pathways (12-14), and are therefore likely mediated by multiple sensed secreted factors.

One powerful strategy to determine the cues being sensed by bacteria is to infer them from the cellular response. Examples include the SOS response indicating the sensing of DNA damage, or the heat shock response revealing the perception of high environmental temperature (15-17). In multispecies communities, specific bacterial responses have been used to identify the interspecific mediators. These include the upregulation of oxidative stress pathways in response to secreted redox-active molecules, alleviation of nutritional requirements due to sensing and use of secreted amino acids or other nutrients, and induction of iron starvation pathways by sensed iron competition caused by siderophores secreted by a foreign species (18-20). However, most such studies of interactions typically focus on a single response and the underlying molecules.

The goal of this work was to develop a comprehensive approach to define which exoproducts from one species are sensed by another and use this framework to study interspecies sensing in a model two-species system consisting of *Pseudomonas aeruginosa* and

*Staphylococcus aureus*. Both are opportunistic pathogens that co-exist in wound infections, nosocomial pneumonia, as well as lung infections in cystic fibrosis (CF) patients (21-24), where co-infection with both pathogens has been associated with increased disease severity (25-27). Identifying the molecular determinants of interactions between these two co-infecting pathogens can thus provide novel insights into persistent infections and multispecies communities in general.

Interactions between these two species have been extensively studied (reviewed by (28-31)). *P. aeruginosa* affects the growth, metabolism, antibiotic resistance, and transcriptional state of *S. aureus*, mainly via the secretion of multiple antimicrobials (6, 32-35). *S. aureus* induces exploratory motility in *P. aeruginosa* via unknown exoproducts, and the quorum sensing molecule autoinducer-2 and cell wall precursor *N*-acetyl glucosamine which can be produced by *S. aureus* affect the regulation of *P. aeruginosa* virulence factors (36-41). However, characterization of the *P. aeruginosa* transcriptional response to *S. aureus*, and the comprehensive identification of the underlying sensed *S. aureus* secreted factors and their production pathways, have not been fully accomplished.

In this study, we outline a strategy to systematically identify the secreted molecules from one species that are sensed by another, utilizing transcriptomics in conjunction with genetic and biochemical screens of promoter-reporters. Our approach revealed that *P. aeruginosa* senses four distinct signals secreted by *S. aureus*: the metallophore staphylopin (StP) which induces zinc starvation, the intermediate metabolites citrate and acetoin which induce their uptake and catabolism, and unidentified molecules that affect iron-related pathways. Through the genome-wide screen, we also delineate the *S. aureus* genes that alter the production of these sensed molecules. Further, we find that these staphylococcal exoproducts mediate both antagonistic and beneficial effects on *P. aeruginosa* physiology. StP participates in metal competition and abrogates *P. aeruginosa* biofilm formation, while the intermediate metabolites can serve as sole carbon sources, and the iron-chelating secreted factors deliver iron to *P. aeruginosa*. Clinical isolates of *S. aureus* show similar production of sensed molecules, and other bacterial species

can also induce some of the same pathways in *P. aeruginosa*, indicating the generality of these phenomena. Finally, we show that these *S. aureus* secreted molecules explain a major part of the *P. aeruginosa* response to *S. aureus*, demonstrating the utility of our approach to identify the secreted factors that underlie interspecies interactions.

## RESULTS

**Framework to comprehensively define the molecular mediators of bacterial interspecies sensing.** We developed a systematic methodology within a two-species system to identify the sensed foreign molecules that underlie the global response of one species to the other (**Fig. 1A**). Our approach first defines the complex response resulting from exposure to a foreign species and identifies the different individual components of the response. Then, these individual responses are used to identify the respective causal foreign molecules via unbiased genetic and biochemical screens. Unlike previous approaches, our strategy does not focus on the effect of individual molecules on a foreign species, or on globally identifying all molecules that are produced by a species, rather each response is used to identify the respective specific foreign molecules that together make up the interspecies interaction.

In the initial step, global transcriptional analysis is performed on one species exposed to another species or its cell-free supernatant compared to monocultures, to identify which pathways are differentially regulated by interspecies sensing. Next, promoter-reporter constructs are designed using representative genes from these upregulated classes. These promoter-reporter strains are then employed in two complementary approaches to identify the sensed interspecific molecules. First, an arrayed transposon mutant library in the species being sensed is screened to determine the mutants that are deficient in inducing reporter expression. The mutants are likely to be involved in the regulation, biosynthesis, or secretion of the cues, and mutant gene function is therefore used to identify the sensed molecules. Second, the sensed supernatant is fractionated to identify fractions that contain the active molecules inducing the promoters which can then be

further analyzed by additional fractionation and mass spectrometry. This two-pronged unbiased approach can thus exhaustively reveal the molecules that lead to complex responses in a foreign species, irrespective of which pathways and mechanisms constitute the response. We applied this scheme to study the *S. aureus* secreted products that are sensed by *P. aeruginosa*.

***P. aeruginosa* senses *S. aureus* secreted products and upregulates metal- and metabolite-related pathways.** We focused on the response of *P. aeruginosa* to *S. aureus* cell-free supernatant, as opposed to a co-culture model, since *P. aeruginosa* produces antimicrobials that may kill and lyse *S. aureus* cells (29, 42, 43), thus affecting the relative levels of staphylococcal secreted products that may be present. To determine the response of *P. aeruginosa* PA14 to *S. aureus* JE2, we performed RNA-seq on early-log phase *P. aeruginosa* cultures at 20 min, 1 h, and 2 h after the addition of 25% (v/v) *S. aureus* spent media or the same volume of media as a control. We found ~100-200 genes that were significantly differentially expressed between these two conditions at each timepoint (**Fig. 1B, Table S1, and S2**).

We identified the major pathways that are induced in *P. aeruginosa* upon sensing *S. aureus* molecules to define candidate promoters for the screening strategy (**Fig. 1A**). First, we performed Gene Ontology (GO) enrichment analysis of the differentially regulated genes in *P. aeruginosa* after *S. aureus* exposure (**Table S3**). The downregulated genes showed enrichment of amino acid metabolism genes while upregulated genes indicated significant enrichment in genes involved in metal ion transport, as well as the biosynthesis of the siderophore pyoverdine, suggesting the sensing of metal deprivation (**Fig. 1C and Table S3**). Several genes previously reported to be controlled by the Zn-dependent repressor Zur, the Fe-dependent repressor Fur, and the Fe-specific sigma factor PvdS in *P. aeruginosa* PAO1 were upregulated 20 min after *S. aureus* supernatant exposure (**Fig. 1D and Table S4**) (44-46). Next, to identify additional robustly upregulated pathways that may not be well described by GO terms, we focused on all the upregulated genes that increased in fold change over time upon *S. aureus* supernatant exposure.

Of the 461 total upregulated genes, 73 increased over time across the three time points (**Fig. S1**). We selected the operons that showed the highest terminal fold change, and these were associated with intermediate metabolite pathways, namely acetoin catabolism and tricarboxylic acids (TCA) uptake (**Fig. 1E and Fig. S1**).

The strongest *P. aeruginosa* response to *S. aureus* cell-free supernatant was thus represented by four pathways: Zn-deprivation, Fe-deprivation, TCA uptake, and acetoin catabolism. We selected one promoter from each of these four pathways whose respective transcripts had distinct patterns of expression in the RNA-seq analysis (PA14\_11320, *pvdG*, *opdH*, *acoR*, respectively) (**Fig. 2A**) and designed promoter-reporters using the fluorescent protein mScarlet. Each reporter led to significantly higher levels of mScarlet expression in the presence of *S. aureus* supernatant, displaying dose-dependent responses compared to the media control (**Fig. 2B**). The two metal deprivation promoter-reporter strains induced the reporter earlier in the supernatant than the control, while the two intermediate metabolite reporter strains induced the reporter almost exclusively upon *S. aureus* supernatant exposure.

**The metallophore activity of staphylopin upregulates the Zn-deprivation response in *P. aeruginosa*.** Each promoter-reporter strain was used to screen supernatants from the Nebraska Transposon Mutant Library (NTML) which contains over 1,800 ordered transposon mutants in methicillin-resistant *S. aureus* JE2 (47). We reasoned that transposon insertions in the genes involved in the expression, biosynthesis, or export of the sensed product(s) would result in altered promoter induction.

Using the promoter of a putative lipoprotein under control of the Zur regulon (PA14\_11320) (44) to screen the NTML for mutants that were deficient in inducing mScarlet reporter expression, we found candidates with transposon insertions in the genes encoding the exporter (*cntE*) or biosynthetic enzymes (*cntKLM*) of the multi-metal binding molecule staphylopin (StP) (**Fig. 3A, 3B, and Table S5**). StP is a nicotianamine-like molecule that is exported out of the cell, where it

binds zinc and imports it back into the cell (48). StP is generated from L-histidine in three stepwise reactions by histidine racemase CntK, nicotianamine synthase CntL, and opine dehydrogenase CntM which incorporates pyruvate at the terminal step (48, 49). StP supports growth in zinc-deficient conditions, and mutants in the StP biosynthesis or export pathways show growth defects in the presence of the zinc chelator *N,N,N',N'*-tetrakis(2-pyridinylmethyl)-1,2-ethanediamine (TPEN) (**Fig. S2A**) (50, 51).

*P. aeruginosa* produces a similar secreted opine metallophore, pseudopaline (PsP), that is also important for zinc uptake, and is produced by CntL and CntM with the addition of a terminal  $\alpha$ -ketoglutarate instead of pyruvate (**Fig. 3A**) (49, 52-54). PsP is exported by CntI in the inner membrane and MexAB-OprM in the outer membrane and is imported back into the cell by CntO (52, 55). The entire *cntOLMI* operon was upregulated upon exposure to *S. aureus* supernatant (**Table S1 and S2**). Along with P'PA14\_11320, we examined StP-mediated induction of two other Zur-regulated promoters: *cntO* (PA14\_63960), the first gene in the *cnt* operon, and *dkxA2* (PA14\_73020), which encodes a transcription factor in an operon with cobalamin synthesis genes (56). *S. aureus cnt* mutants lacking StP reduced mScarlet reporter expression from these three Zur-regulated promoters compared to wild type (WT) (**Fig. 3B**). The addition of increasing amounts of StP to the *cntM::tn* mutant supernatant restored P'PA14\_11320 induction to WT levels at concentrations greater than 40  $\mu$ M (**Fig. 3C**), indicating that similar concentrations are likely present in staphylococcal supernatant. Next, we sought to characterize if StP chelates metals from or delivers metals to *P. aeruginosa*. Addition of the zinc chelator TPEN increased promoter induction, with 0.5  $\mu$ M mimicking the induction seen upon addition of *S. aureus* supernatant (**Fig. 3D and Fig. S2B**). Inversely, the induction was decreased by the addition of zinc, cobalt, or nickel (**Fig. 3E and Fig. S2C**) suggesting that StP chelates these metals, thereby inducing the zinc starvation response in *P. aeruginosa*.

To examine the role of the similar *P. aeruginosa* opine metallophore PsP in the response to StP, induction of P'PA14\_11320 was measured in *P. aeruginosa* mutants lacking the genes



encoding the importer (*cntO*), exporter (*cntI*), or entire *cnt* operon for PsP. Upon supernatant addition, induction of mScarlet reporter expression was increased in the  $\Delta cntO$  and  $\Delta cnt$  mutants compared to the WT (**Fig. 3F**), demonstrating that the presence of PsP decreases StP-induced zinc starvation. Thus, in response to the opine metallophore StP, *P. aeruginosa* induces the Zur regulon which includes genes to synthesize its own zinc metallophore, PsP.

Higher levels of zinc availability are associated with increased *P. aeruginosa* biofilm formation and increased antagonism of *S. aureus* (57-59). We therefore explored the effects of StP, which we expect leads to zinc starvation, on *P. aeruginosa* biofilm formation and *P. aeruginosa*-*S. aureus* polymicrobial interactions. *P. aeruginosa* was grown in static conditions in medium with 0, 5, or 10  $\mu$ M zinc added, and zinc addition increased biofilm formation (**Fig. 3G**). While the addition of 1 or 2  $\mu$ M TPEN had only modest effects on biofilm formation, 80  $\mu$ M StP reversed the effects of zinc addition and inhibited biofilm formation (**Fig. 3G**). A major component of *P. aeruginosa*-*S. aureus* interactions are *P. aeruginosa*-produced antimicrobials that inhibit *S. aureus* growth (29). To assess the role of StP on the inhibition of *S. aureus* growth by *P. aeruginosa*, cell-free supernatants were collected from *P. aeruginosa* cultures grown in 10  $\mu$ M zinc, 1  $\mu$ M TPEN, or 80  $\mu$ M StP, and the growth of *S. aureus* in 50% (v/v) supernatant was determined. While supernatant from *P. aeruginosa* grown in zinc or TPEN inhibited *S. aureus* survival similar to the control, supernatant from *P. aeruginosa* cultured with StP showed lower inhibition of *S. aureus*, suggesting that StP may affect *P. aeruginosa* antimicrobial production (**Fig. S2D**).

**Staphylococcal secreted products affect siderophore-biosynthesis responses in *P. aeruginosa*.** To determine the secreted products affecting the iron starvation response, the *S. aureus* transposon library was screened with the promoter of a pyoverdine synthesis gene, *pvdG*, which is induced by low-iron conditions (46). Since the *P. aeruginosa* Zur regulon was responding to a metallophore, we hypothesized that the *pvdG* promoter would similarly respond to a

siderophore but none of the *S. aureus* siderophore mutants reduced induction (**Table S6**). Instead, we identified more than 100 mutants each that had a higher (upregulating) or lower (downregulating) induction of the reporter compared to the WT (**Fig. 4A and Table S6**), and the relative iron chelation of the mutant supernatants did not correlate with their promoter induction ( $r = -0.04$ ) (**Fig. 4B, S3A, and Table S7**). Several downregulating supernatants had significantly higher chelation than WT, including those from mutants of the ATP-dependent proteases ClpC and ClpP, suggesting that these proteases contribute to the regulation of the chelating factor(s) (**Fig. 4B and Table S7**).

It has been reported that *P. aeruginosa* can utilize specific iron-chelating xenosiderophores such as deferoxamine (DFX) to obtain iron (60-63), and P'*pvdG* was repressed by DFX (**Fig. S3B**), showing iron delivery to *P. aeruginosa*. As a control, another iron chelator diethylene triamine penta-acetic acid (DTPA), which chelates iron away from *P. aeruginosa*, induced P'*pvdG* (**Fig. S3B**). Thus, the lack of correlation between P'*pvdG* induction and relative chelation by the *S. aureus* mutant supernatants may be due to a combination of iron competition and delivery to *P. aeruginosa*.

Next, we employed the second approach in our strategy to determine the sensed secreted products (**Fig. 1A**) where we biochemically fractionated *S. aureus* supernatant by size-exclusion chromatography and then screened concentrated fractions for their ability to induce the P'*pvdG* promoter-reporter. We also treated each fraction with proteinase K to determine if the active molecule(s) contain peptide bonds. Relative to the water control, fraction 4 increased promoter induction, but this was abolished by proteinase K treatment, while fraction 5 only induced the promoter after proteinase K treatment (**Fig. 4C**). Additionally, fractions 6-12 decreased induction regardless of proteinase K treatment (**Fig. 4C**). Similar to our observations with the mutant supernatants, fraction 4 did not have any chelating activity, whereas the fractions that decreased promoter induction (fractions 6-12) did (**Fig. 4D**). This suggests that the chelators present in the

downregulating fractions repressed the expression of pyoverdine biosynthesis genes, possibly due to delivery of iron to *P. aeruginosa*.

To test if secreted staphylococcal molecules could deliver iron to *P. aeruginosa*, we used a *P. aeruginosa*  $\Delta pvdJ \Delta pchE$  mutant, which cannot produce the siderophores pyoverdine and pyochelin. The  $\Delta pvdJ \Delta pchE$  mutant is unable to grow in medium containing 200  $\mu$ M of the iron chelator 2,2'-bipyridyl (BIP). The addition of DFX, but not DTPA, supports its growth in BIP media (**Fig. S3C**), confirming the ability of *P. aeruginosa* to utilize DFX to take up iron in the absence of its own siderophores. Interestingly, the  $\Delta pvdJ \Delta pchE$  mutant grew in BIP media after addition of whole *S. aureus* supernatant or individual fractions 5-12, but not media (**Fig. 4E and Fig. S3C**). Together with the promoter-reporter and iron chelation assays, these results indicate that one or more *S. aureus* chelators deliver iron to *P. aeruginosa*, while at least one staphylococcal exoproduct without chelating activity induces pyoverdine production.

***S. aureus* secreted intermediate metabolites citric acid and acetoin induce uptake and catabolism in *P. aeruginosa*.** To determine the staphylococcal secreted products that induce expression of the TCA uptake operon, the NTML transposon collection was screened with the *opdH* promoter-reporter strain. *OpdH* is a porin that uptakes TCAs, and is induced by the TCAs isocitrate, cis-aconitate, and citrate (64). Similar to the screen with the *pvdG* promoter, we obtained more than 100 mutants that upregulated or downregulated the *opdH* promoter (**Fig. 5A and Table S8**). GO enrichment analysis of these mutants indicated that aspartate family amino acid biosynthesis genes were enriched in the upregulating mutants and branched-chain amino acid biosynthesis, metabolism, and cellular respiration pathways were enriched in the downregulating mutants (**Fig. 5B and Table S9**) (65-67). Many of the identified genes encode proteins that catalyze enzymatic reactions within the TCA cycle and related pathways (**Fig. 5C, Table S8, and Table S9**). This included the downregulating supernatant from *gltA::tn* which encodes citrate synthase II which converts TCA intermediates to citrate, and the upregulating

supernatant from *acnA::tn* encoding aconitate hydratase which breaks down citrate (**Fig. 5A and Table S8**), suggesting that *S. aureus*-secreted citrate may induce the *opdH* promoter-reporter. Exogenously added citrate induced the *P'opdH* reporter in a dose-dependent manner with between 100-200  $\mu$ M having similar induction to *S. aureus* supernatant (**Fig. 5D**), and direct measurements showed that *S. aureus* supernatant contained  $166.0 \pm 13.0$   $\mu$ M citrate (**Fig. 5E and Table S10**). Citrate concentrations in the upregulating and downregulating mutant supernatants significantly correlated with induction of the *P'opdH* promoter (Pearson's  $r = 0.6663$ ,  $p < 0.0001$ ) (**Fig. 5E and Table S10**). Therefore, *S. aureus* secretes the TCA intermediate metabolite citrate which is sensed by *P. aeruginosa*.

Recently, it was described that acetoin is released by *S. aureus* and in response, *P. aeruginosa* upregulates acetoin and butanoate pathways, including the *acoR* gene, which encodes a transcriptional regulator of the acetoin catabolism operon (68-70). We predicted that a transposon mutant screen of *P'acoR* induction may identify mutations in staphylococcal acetoin production and/or secretion. We identified nearly 200 mutants each that induced or repressed the promoter (**Fig. 6A and Table S11**); however, no significant pathways were identified by GO enrichment analysis. Two of the most downregulating mutant supernatants had transposon insertions in *ilvB* and *ilvN*, which encode enzymes that convert pyruvate into  $\alpha$ -acetolactate, leading into the butanoate cycle where acetoin and 2,3-butanediol are synthesized and catabolized (**Fig. 6A, C, and Table S11**). The promoter of *acoR* is responsive to acetoin, 2,3-butanediol, and  $\alpha$ -acetolactate, but not citrate (**Fig. 6B and Fig. S4A**), however 2,3-butanediol and  $\alpha$ -acetolactate could not be detected in *S. aureus* supernatant in quantities that would be needed to induce the promoter (**Fig. S4B**). The acetoin concentration in the regulating mutant supernatants correlated with promoter induction in most supernatants (Pearson's  $r = 0.2157$ ,  $p < 0.0001$ ), including those of genes leading into the butanoate cycle (**Fig. 6C and D**). However, a few select downregulating mutant supernatants contained significantly higher acetoin levels than WT, such as *sucD* encoding succinyl-CoA synthase and the *clpC* and *clpP* mutants (**Fig. 6D and**

**Table S12).** Therefore, the main staphylococcal metabolite that induces *acoR* expression is acetoin.

To ascertain if these intermediate metabolites can be utilized as carbon sources by *P. aeruginosa*, 1 mM citrate, 2,3-butanediol, and/or acetoin, or 1 mM glucose as a positive control, were added to the growth medium as the sole carbon source and *P. aeruginosa* growth was monitored for 16 h. As expected, in the absence of any carbon sources, *P. aeruginosa* was unable to grow ( $k = 0.003$ ), while it grew with the addition of glucose ( $k = 1.057$ ) (**Fig. 6E**). *P. aeruginosa* was also able to grow after addition of citric acid, 2-3-butanediol, and acetoin in combination ( $k = 0.781$ ), or with just citric acid ( $k = 0.625$ ), while slight growth was seen after the addition of 2,3-butanediol or acetoin alone ( $k = 0.273$  and  $0.270$ ) (**Fig. 6E**). Thus, *P. aeruginosa* can utilize these secreted intermediate metabolites as energy sources.

***S. aureus* clinical isolates and other bacterial species also produce exoproducts that induce *P. aeruginosa* response pathways.** Through the promoter-reporter screens, we identified four distinct pathways in *P. aeruginosa* that are induced by *S. aureus* JE2 secreted products. To test how widespread the production of these molecules is, we surveyed supernatants from four clinical isolates of *S. aureus* that were mono-isolated (CF049 strain) or co-isolated with *P. aeruginosa* (CF061, CF085, and CF089 strains) from cystic fibrosis patients. Supernatants from these strains induced all four promoter-reporters in *P. aeruginosa* (**Fig. 7A**), albeit to different degrees. While all the strains contained chelators, only CF049 and CF061 supported siderophore-deficient *P. aeruginosa* growth in iron-restricted medium (**Fig. 7B and C**). CF089, which showed the highest relative chelation, was unable to support the growth of the *P. aeruginosa* siderophore mutant, indicating that *S. aureus* likely produces multiple chelators, only some of which can deliver iron to *P. aeruginosa*, and the relative amounts of these may vary between strains. In addition, citrate and acetoin concentrations in the supernatants largely correlated with induction of the

*opdH* and *acoR* promoters, respectively, except for CF061 and CF085 having lower levels of acetoin (**Fig. 7D**).

Since the sensing pathways in *P. aeruginosa* were induced by different strains of *S. aureus*, we wondered if other bacterial species could also induce similar responses in *P. aeruginosa*. Therefore, we tested cell-free supernatants from eight additional species: *Bacillus subtilis*, *Staphylococcus epidermidis*, *Burkholderia cenocepacia*, *Escherichia coli*, *Klebsiella pneumoniae*, *Salmonella enterica* Typhimurium, *Stenotrophomonas maltophilia*, and *Vibrio cholerae*. Induction of the *P. aeruginosa* response pathways varied among the species, with different combinations of two to four species inducing each pathway (**Fig. S5**). Notably, *S. epidermidis*, which is most closely related to *S. aureus*, did not induce zinc deprivation, pyoverdine production, or *opdH* in *P. aeruginosa*, whereas *B. cenocepacia* induced all four promoters (**Fig. S5**).

**Identified secreted factors underlie a major part of the *P. aeruginosa* response to staphylococcal exoproducts.** To determine if the identified molecules recapitulated the effect of *S. aureus* whole supernatant on *P. aeruginosa*, we added the individual molecules or a combination of all molecules to medium to *P. aeruginosa* cells and performed RNA-seq after 20 min and 2 h incubation (**Table S13**). The molecules were added at concentrations measured from the supernatant or that induced equivalent promoter activity: 80  $\mu$ M StP, 150  $\mu$ M citrate, and 150  $\mu$ M acetoin. Since we did not identify the molecule(s) that induce the promoter of *pvdG*, we added a mixture of the iron chelators DTPA and DFX at concentrations that represented the induction of mScarlet reporter production (**Fig. S3B**). The mixture of the two chelators was added to mimic the dual phenotypes we observed, where DTPA induces the *pvdG* promoter, and DFX delivers iron to *P. aeruginosa*. As expected, each of the four products induced the respective response pathway in *P. aeruginosa* (**Fig. 8A**). Compared to the medium control, addition of the supernatant, the respectively paired identified products, or all products in combination led to upregulation of

the metal starvation genes PA14\_11320 and *pvdG* at 20 min and intermediate metabolite uptake and metabolism genes *opdH* and *acoR* at 2 h (**Fig. 8A and Table S13**). DTPA/DFX also induced PA14\_11320, potentially due to chelation of zinc by DTPA (**Fig. 8A**) (71). We next determined what proportion of the *P. aeruginosa* response to *S. aureus* supernatant was explained by the identified products. Of the 417 genes that were upregulated upon exposure to *S. aureus* supernatant, 235 (56.3%) were also induced by at least one of the identified products, while 218 (52.3%) were induced upon exposure to the combination of all products (**Fig. 8B**). Despite the sensed products being identified using upregulated promoter-reporters, of the 263 genes that were downregulated upon exposure to *S. aureus* supernatant, 133 (50.6%) were also repressed by at least one of the identified products, while the combination of all molecules downregulated 77 genes (29.3%) (**Fig. S6A**). Thus, the four classes of identified sensed molecules account for a substantial part of both the upregulated and downregulated transcriptional responses of *P. aeruginosa* to *S. aureus* supernatant.

Given that we selected our promoter-reporters based on significantly enriched pathways and genes with high fold change of gene expression (**Fig. 1B and D**), we posited that our identified sensed molecules likely underlie the upregulation of genes with higher fold change. In fact, the genes upregulated by both *S. aureus* supernatant and at least one of the identified molecules had a significantly higher fold change (mean  $\log_2(\text{fold change}) = 2.38$ ) when compared to the genes that are solely induced by *S. aureus* supernatant (mean  $\log_2(\text{fold change}) = 1.50$ ) (**Fig. 8C**). For the downregulated genes, the overlapping genes had a significantly lower fold change (mean  $\log_2(\text{fold change}) = -1.83$ ) when compared to the genes solely repressed by *S. aureus* supernatant (mean  $\log_2(\text{fold change}) = -1.33$ ) (**Fig. S6B**).

We determined which molecules explained what proportion of the response to staphylococcal supernatant by generating an UpSet plot to show intersections of upregulated genes in the supernatant with those among groups of the other conditions (**Fig. 8D and Fig. S6C and D for expanded UpSet plots**). The largest intersections were between the shared



upregulated genes after addition of the combination of all molecules and the iron chelators DTPA/deferoxamine (130 genes), and these conditions and StP (42 genes) (**Fig. 8D**). These comparisons indicate that many of the genes induced by *S. aureus* supernatant are due to effects of exoproducts that induce iron-related pathways as well as zinc starvation, however intersections were found between the upregulated genes in *S. aureus* supernatant and each of the other conditions, showing their contribution to inducing distinct sensing pathways in *P. aeruginosa*. Taken together, we describe a model where *P. aeruginosa* senses the secreted staphylococcal molecules StP, iron chelators and unidentified proteins, and intermediate metabolites, and upregulates metal starvation pathways, thereby producing PsP and pyoverdine, and metabolite uptake and catabolism pathways to use citrate and acetoin as carbon sources (**Fig. 8E**).

## DISCUSSION

In this study, we developed a systematic unbiased strategy using transcriptomics combined with genetics to determine the secreted exoproducts from one species that can be sensed by another in a model two-species system. We used this approach to study the sensing of *S. aureus* by *P. aeruginosa*. Unlike other strategies that focus on a single molecule or response pathway of interest, our genome-scale approach revealed multiple staphylococcal factors that are sensed by *P. aeruginosa*, illustrating that interactions even between just two species can be complex and mediated by diverse molecules (**Fig. 8E**). Our genome-wide screen also determined the mutations in *S. aureus* that affect the regulation, biosynthesis, and/or secretion of the sensed exoproducts. The sensed molecules we identified explain most of the *P. aeruginosa* transcriptional response to *S. aureus* in our system, suggesting that this systematic genome-wide approach can be applied to other two-species systems to comprehensively identify the underlying molecules that affect bacterial sensing in multispecies communities.

*P. aeruginosa* and *S. aureus* are commonly co-isolated from lung infections in CF patients and together contribute to worse disease outcomes compared to mono-infections (26, 27). It is



therefore imperative to better understand their interactions and the molecular mediators involved. Here we found that *P. aeruginosa* senses multiple distinct *S. aureus* secreted molecules: the metallophore StP which affects zinc starvation and biofilm formation, unidentified molecules that affect pyoverdine production and/or deliver iron to *P. aeruginosa*, and the intermediate metabolites citrate and acetoin which are carbon sources for *P. aeruginosa*. Further, production of the sensed molecules was conserved in clinical isolates of *S. aureus* suggesting that these pathways and interactions are common between these two species.

Staphylococcal exoproducts affected *P. aeruginosa* metal homeostasis, and zinc and iron chelators defined >45% of the transcriptional response to *S. aureus* supernatant (**Fig. 8D, Fig. S6, and Table S13**). Zinc availability is required for virulence traits in both species, affecting *P. aeruginosa* motility, biofilm formation, and protease activity (58, 59, 72-74) and *S. aureus* biofilm formation and growth *in vivo* (50, 75-77). Interactions between *P. aeruginosa* and *S. aureus* in the context of zinc deprivation have been studied before in the presence of a neutrophil-derived metallophore, calprotectin, which binds zinc, manganese, nickel, and iron. Through metal chelation, calprotectin decreases anti-staphylococcal antimicrobial production and inhibits extracellular protease-mediated lysis of *S. aureus* thereby promoting coexistence between *P. aeruginosa* and *S. aureus* (57, 58). Moreover, it has been shown that the availability of zinc affects interactions between *P. aeruginosa* and the oral commensal species *Streptococcus sanguinis* SK36, likely due to zinc sequestration by *P. aeruginosa* (78). We found that *S. aureus*-secreted StP led to the upregulation of the biosynthesis genes of the metallophore PsP as well as other components of the Zur-dependent zinc starvation response in *P. aeruginosa* due to reduced availability of zinc. Additionally, StP inhibited *P. aeruginosa* biofilm formation and reduced *P. aeruginosa* antimicrobial killing of *S. aureus*. Our screen thus revealed a new interaction between *S. aureus* and *P. aeruginosa* through competition for and modulation of zinc availability by microbial opine metallophores. Zinc deprivation genes in *P. aeruginosa* are known to be induced

in CF sputum (79-81), and our data suggest that competition with *S. aureus* may contribute to the induction.

*P. aeruginosa* and *S. aureus* are thought to compete for limited iron availability during infection via the secretion of iron-chelating siderophores and various iron uptake systems (28, 82). However, other studies have shown a downregulation of the *P. aeruginosa* iron starvation response in the presence of *S. aureus* or cell-free supernatant (35, 70, 83) and lysis of *S. aureus* liberates intracellular iron for acquisition by *P. aeruginosa* (35). The differences between studies could be due to variability in the iron content of the culture media as well as the *S. aureus* strains used. The results of our work support a complex effect of *S. aureus* on the *P. aeruginosa* iron response where on the whole *S. aureus* secreted products led to an induction of *P. aeruginosa* iron starvation responsive Fur- and PvdS-regulons, but *P. aeruginosa* obtains iron from specific staphylococcal chelators through xenosiderophore piracy, iron acquisition via uptake of a foreign siderophore (84). Characterization of this intriguing iron piracy, and identification of the likely novel underlying molecules, will be the subject of a future study.

Through the transposon screen with P'*pvdG*, we also described the mutations in *S. aureus* that affect production of these molecules and hence iron-responsive pathways in *P. aeruginosa*, including in genes encoding metabolic enzymes, transcriptional regulators, and proteases. Particularly, supernatant from *S. aureus clpP* and *clpC* mutants led to decreased *pvdG* promoter induction, but a large increase in relative chelation (**Fig. 4B**). Clp proteases comprise the main proteolytic system in *S. aureus* and are known to affect iron homeostasis (85, 86), and our data reinforce the idea that some *S. aureus* iron-related molecules may be direct or indirect targets of the Clp proteolysis machinery.

Our results also define a syntrophic relationship between *P. aeruginosa* and *S. aureus* where staphylococcal secreted intermediate metabolites citrate and acetoin can be used as carbon sources by *P. aeruginosa*. Costless secretion of valuable metabolites, especially of organic acids, is predicted to enable positive interspecies interactions through cross-feeding (87).

It was reported previously that *P. aeruginosa* can take up both metabolites as carbon sources (64, 70, 88, 89), and acetoin was recently identified to participate in this cooperative interaction between *P. aeruginosa* and *S. aureus* in clinical co-isolates (70), which validates our screening approach in determining sensed exoproducts. Extracellular citrate has been detected in *S. aureus* cultures previously (90, 91), and our work shows that this staphylococcal secreted metabolite can be sensed by *P. aeruginosa*, thus defining another cooperative interaction between these two co-infecting pathogens. Higher concentrations of citrate affect quorum sensing and biofilm formation, and mediate iron uptake in *P. aeruginosa* (60, 92, 93). While citrate did not affect iron pathways in our study at the concentration found in *S. aureus* JE2 supernatant (**Table S13**), it is possible that higher concentrations that facilitate iron uptake may exist in communities with these two species. Our genome-wide screen identified mutations in *S. aureus* that affect production and/or secretion of these sensed intermediate metabolites, which is not only important for better understanding these cooperative interspecies interactions and general metabolism but also has implications for the effects of these metabolites on *S. aureus* such as acetoin affecting stress resistance or citrate influencing virulence (91, 94).

Previous studies have identified additional molecules that can be secreted by *S. aureus*, and are sensed by *P. aeruginosa*, such as *N*-acetyl glucosamine which induces the *nag* operon and autoinducer-2 which induces several virulence genes (36, 39, 95). However, these products were not identified during *S. aureus* co-culture and/or incubation with *S. aureus* supernatant, but rather with Gram-positive bacterial communities. We did not see these response pathways being induced in our study upon exposure to *S. aureus* cell-free supernatant, possibly due to differences in growth medium, experimental conditions, and timing of gene expression measurements between the studies, and/or insufficient amounts of these products being present in 25% (v/v) *S. aureus* supernatant.

There are limitations and considerations to using our screening approach. First, our study was conducted in a defined medium to avoid introduction of molecules from another species into

the two-species system, such as culture media compositions that contain whole cell lysates, and it is important to consider that culture and growth conditions may affect either secreted molecule production and/or sensory responses. Next, the species being studied must have the necessary genetic tools available, such as reporter expression systems and random mutagenesis protocols, however these are becoming more widely accessible (96-98). The identification of sensed products using our approach was more straightforward when there was a primary sensory molecule driving the response, such as in the case of StP, citrate, or acetoin, although fractionation of WT and mutant supernatants can reveal the molecules underlying multifactor-driven responses as well. Another consideration is that there is significant strain to strain variability in bacteria, and studies should therefore utilize a panel of strains to interrogate interspecies sensing. While our screen was carried out in a single strain of each species, we validated that *S. aureus* clinical isolates from cystic fibrosis patients, including strains that were co-isolated with *P. aeruginosa*, retained production of molecules that induced the sensory pathways, albeit at varying levels.

Studies of interactions between *P. aeruginosa* and *S. aureus* have often focused on the effects of *P. aeruginosa* antimicrobials on staphylococcal growth and survival, however it is an active question if these species, which are often co-isolated, are more prone to competition or coexistence (31). Here by identifying the staphylococcal secreted products that are sensed by *P. aeruginosa*, we uncovered instances of both aspects: competition for metals, siderophore piracy, lifestyle alteration via inhibition of biofilm formation, and cooperation through release of intermediate metabolites used as carbon sources. Altering the production of these factors could potentially tip the balance in favor of a more beneficial or antagonistic interaction between these species.

## MATERIALS AND METHODS

### Bacterial strains and growth conditions.

Bacterial strains utilized in this study are listed in **Table S14**. *P. aeruginosa* UCBPP-PA14 (99) and *S. aureus* JE2 (47), other species listed, and their derivatives were grown in a modified M63 medium (100) (13.6 g·L<sup>-1</sup> KH<sub>2</sub>PO<sub>4</sub>, 2 g·L<sup>-1</sup> (NH<sub>4</sub>)<sub>2</sub>SO<sub>4</sub>, 0.8 μM ferric citrate, 1 mM MgSO<sub>4</sub>; pH adjusted to 7.0 with KOH) supplemented with 0.3% glucose, 1× ACGU solution (Teknova), 1× supplement EZ (Teknova), 70 ng·L<sup>-1</sup> biotin, and 7 mg·L<sup>-1</sup> nicotinamide, at 37°C, shaken at 300 rpm, except where noted. *Vibrio cholerae* was grown in M63 with the addition of 2% NaCl. For *P. aeruginosa* Δ*pvdJ* Δ*pchE* growth assays, 200 μM 2,2'-bipyridyl (BIP) (Sigma Aldrich) was added to M63 medium. For sole carbon source growth assays, EZ and glucose were not added in the formulation. For each growth assay, *P. aeruginosa* overnight cultures were diluted to an OD<sub>600</sub> of 0.05 before monitoring growth. The Nebraska Transposon Mutant Library (NTML) made up of 1,920 arrayed *bursa aurealis* transposon insertions in *S. aureus* JE2 was utilized for the transposon screen (47). For cloning and strain construction, strains were routinely cultured in Luria Bertani (Miller) broth or on agar plates with 20 g·L<sup>-1</sup> agar. For selection, antibiotics were added as 50 μg·mL<sup>-1</sup> gentamicin, 25 μg·mL<sup>-1</sup> irgasan, 50 μg·mL<sup>-1</sup> carbenicillin, and/or 10 μg·mL<sup>-1</sup> erythromycin as needed. Other additives include staphylopine (Santa Cruz Biotechnology), TPEN (Sigma Aldrich), ZnSO<sub>4</sub>·7H<sub>2</sub>O (Sigma Aldrich), NiCl<sub>2</sub>·6H<sub>2</sub>O (J. T. Baker Chemical Company), CoCl<sub>2</sub>·6H<sub>2</sub>O (Sigma Aldrich), DTPA (Sigma Aldrich), deferoxamine mesylate salt (Sigma Aldrich), and intermediate metabolites citric acid (Sigma Aldrich), acetoin (Sigma Aldrich), 2,3-butanediol (98% (v/v) solution, Sigma Aldrich), and (S)-α-acetolactic acid potassium salt (Toronto Research Chemicals).

### Preparation of *S. aureus* cell-free supernatant.

Overnight cultures of *S. aureus* strains were diluted to OD<sub>600</sub> of 0.05 in fresh media and grown for 24 h in flasks (or tubes or 96-well plates for NTML library supernatant preparation). Bacterial

cultures grown in flasks were centrifuged at 4000 rpm for 20 minutes. The supernatant was applied to a Steriflip unit with a 0.2  $\mu$ m polyethersulfone filter (MilliporeSigma). For supernatants prepared from the NTML library in 1-mL tube cultures or 96-well plates, culture was directly transferred to AcroPrep Advance 96-well 0.2  $\mu$ m polyethersulfone filter plates (Pall) and centrifuged at 4000 rpm for 10 min to collect the sterile-filtered flow through. Supernatants were stored at -30°C until use.

### **RNA extraction and library preparation.**

*P. aeruginosa* overnight cultures were diluted to OD<sub>600</sub> of 0.05 in fresh media in flasks and grown to OD<sub>600</sub> of 0.50. Two milliliters were collected for RNA extraction immediately before addition of 5 mL (25% v/v) of either fresh media, supernatant, or additives in media and collected after 20 min, 1 h, and 2 h for the data described in Fig. 1 and after 20 min and 2 h for the data described in Fig. 8. Removed culture was mixed with 4 mL of RNeasy Protect Bacteria Reagent (Qiagen) for stabilization and incubated for 5 min at room temperature before centrifugation at 4000 rpm for 10 min. Supernatants were completely removed before storage of the pellets at -80°C. RNA was extracted using the Total RNA Purification Plus Kit (Norgen) according to the manufacturer's instructions for Gram-negative bacteria. The extracted RNA was subjected to an additional genomic DNA removal by DNase I treatment in solution using the TURBO DNA-free Kit (Invitrogen) and checked by PCR for the absence of contaminating DNA. Integrity of the RNA preparation was confirmed by running on an agarose gel and observing intact rRNA bands. Next, rRNA was removed using the Ribo-Zero Depletion Kit for Gram Negative Bacteria (Illumina) or riboPOOLs (siTOOLs Biotech) before library preparation with the NEBNext Ultra II Directional RNA Library Prep Kit for Illumina (New England Biolabs). The sequencing was performed at the Center for Cancer Research Genomics Core Facility. Two biological replicates were performed.

## RNA-seq analysis.

The sequencing files were processed with Cutadapt (101) and Trimmomatic (102). Alignment to the *P. aeruginosa* UCBPP-PA14 genome (NCBI) and pairwise comparisons were made using Rockhopper (Wellesley College) (103, 104). Upregulated and downregulated genes were based on transcripts that had  $p < 0.05$  and  $\log_2$  fold change  $\geq$  or  $\leq 1$ . Venn diagrams were generated using matplotlib\_venn package with venn3 using Python (105). All upregulated genes were evaluated for increasing fold change over time. UpSet plots were generated with ComplexUpset using R (106). For UpSet plots, all upregulated genes at 20 min and 2 h were combined and compared between datasets.

## Construction of *P. aeruginosa* promoter-reporter strains and mutants.

Bacterial strains and plasmids are listed in **Table S14**. Promoter sequences were amplified using the primers listed in **Table S15**. The amplified fragments were cloned by Gibson Assembly (NEB) into SpeI- and XhoI-digested pSEK109 (pLB3208), provided by the Dietrich lab (107). Plasmids were transformed into *E. coli* S17-1  $\lambda$ -pir and confirmed by sequencing. Next, bi-parental conjugations were conducted as described previously between *E. coli* donor cells and *P. aeruginosa* recipients (20). For each conjugation, cells were collected and plated on LB + irgasan + gentamicin plates. The integration was then unmarked using Flp-FRT recombination by mating with an *E. coli* donor strain harboring the pFLP2 plasmid, selecting on LB + irgasan + carbenicillin, and further curing of this plasmid by selecting on LB plates (without NaCl) + 10% sucrose (108). All promoter-reporter strains were confirmed by PCR with the forward primer for the promoter and the reverse primer internal to mScarlet Pa094. For mutant construction, homologous downstream and upstream arms of *cnt* genes were amplified using the primers listed in **Table S15**. The amplified fragments were cloned into pDONRPEX18Gm *attP* sites using the Gateway BP Clonase II Enzyme mix (ThermoFisher). Plasmids were transformed into *E. coli* S17-1  $\lambda$ -pir and confirmed by sequencing prior to conjugation as described above. Conjugants were streaked onto LB plates



(without NaCl) + 10% sucrose, and then tested for gentamicin resistance. Gentamicin-sensitive strains were tested for the deletion by PCR and sequencing.

#### **Plate reporter assay.**

*P. aeruginosa* overnight cultures were diluted to OD<sub>600</sub> of 0.05 in fresh media in flasks and grown to OD<sub>600</sub> of 0.5. At this time, 150 µL of culture was added to wells of a 96-well clear, flat-bottom polystyrene plate with 50 µL fresh media (control) or *S. aureus* supernatant with or without additives as described. Plates were incubated at 37°C with continuous orbital shaking at 807 cycles per minute (cpm) in a Synergy H1 microplate reader (BioTek) with fluorescence and optical density measurements every 30 minutes (mScarlet: 565 nm excitation and 600 nm emission; pyoverdine: 405 nm excitation and 460 nm emission (109); optical density at 600 nm). Measurements for duplicate wells were averaged, and the fluorescence was normalized to the growth (relative fluorescence units divided by the OD<sub>600</sub>). Slopes were calculated from 1.5-5 h (promoters of PA14\_11320, *cntO*, PA14\_73020, *opdH*, and *acoR*) or 1-4 h (promoter of *pvdG* and pyoverdine).

#### **Gene ontology (GO) enrichment analysis.**

For *P. aeruginosa* PA14 pathway analysis, the open reading frame designations for the corresponding PAO1 orthologs of *P. aeruginosa* UCBPP-PA14 genes were obtained using the *Pseudomonas* Genome Database ([www.pseudomonas.com/rbbh/pairs](http://www.pseudomonas.com/rbbh/pairs)) (110). Similarly, for *S. aureus* JE2 pathway analysis, the open reading frame designations for the corresponding NCTC8325 orthologs of *S. aureus* JE2 USA300\_FPR3757 genes were obtained using the AureoWiki repository (<http://aureowiki.med.uni-greifswalk.de/Downloads>) (111). The list of designations from the RNA-seq analysis (*P. aeruginosa*) or selected transposon mutants (*S. aureus*) were analyzed at the Gene Ontology Resource ([www.geneontology.org](http://www.geneontology.org)) by the PANTHER Overrepresentation Test (released 20210224) (Annotation Version and Release Date:



GO Ontology database DOI: 10.5281/zenodo.5228828 Released 2021-08-18) or (released 20200728) (Annotation Version and Release Date: GO Ontology database DOI: 10.5281/zenodo.4081749 Released 2020-10-09), respectively, for enriched biological processes by Fisher's exact test with Bonferroni correction.

### **Biochemical fractionation.**

Five milliliters of *S. aureus* supernatant were frozen and lyophilized before resuspension in 500  $\mu$ L of filtered water. The resuspension was separated using a Superdex 30 10/300 GL size exclusion column (GE Healthcare) with filtered water as buffer at a flow rate of 0.7 mL $\cdot$ min<sup>-1</sup> for 1.5 column volumes at 2.6 MPa for a total of 36.5 mL with 18 fractions collected after every 2 mL. Fractions were frozen, lyophilized, and resuspended in 500  $\mu$ L of water. For protease digestion, 60  $\mu$ L of each fraction was treated with 1  $\mu$ L of thermolabile proteinase K (New England Biolabs) for 1 h at 37°C followed by inactivation for 10 min at 55°C.

### **Biofilm formation assay.**

*P. aeruginosa* was grown overnight in modified M63 medium. Overnight culture was diluted to a starting OD<sub>600</sub> of 0.05 in fresh medium mixed with the indicated additives as described. One hundred  $\mu$ L of culture was added to eight replicate wells of a 96-well plate. Biofilms were allowed to form in static conditions for 24 h at 37°C and assessed for biofilm formation using crystal violet staining (112).

### **Supernatant survival assay.**

To prepare cell-free supernatant, *P. aeruginosa* was inoculated from an overnight culture at an OD<sub>600</sub> of 0.05 and allowed to grow for 16 h in medium with the indicated additives. The culture was centrifuged, and the supernatant was filtered with a Steriflip unit with a 0.2  $\mu$ m polyethersulfone filter (MilliporeSigma). For the survival assay, *S. aureus* was inoculated from an

overnight culture at an OD<sub>600</sub> of 0.05 and grown to an OD<sub>600</sub> of 0.5. Next, 500 µL of culture was added to 500 µL (50% v/v final concentration) of either *P. aeruginosa* cell-free supernatant or M63 salts control. After 16 h, *S. aureus* was plated on LB agar plates and enumerated after growth.

#### **Chromeazurol S (CAS) assay for iron chelation.**

Solutions were prepared exactly as described and assay was performed as described with some changes (113). One hundred microliters of M63 media reference or 75 µL M63 with 25 µL of *S. aureus* supernatant (1X concentration) were added to plate and mixed with 100 µL CAS shuttle solution. Plates were incubated for 1 h at room temperature. The absorbance was measured at OD<sub>630</sub>. The absorbance ratio was calculated by dividing the average absorbance for the sample by the absorbance of the media reference. Next, this ratio was normalized to a standard log-based curve of WT supernatant to return the relative chelation.

#### **Citrate measurements.**

Citrate concentrations were measured in *S. aureus* supernatant using the Citric Acid Assay Kit (Megazyme) according to the microplate assay instructions. Absorbances after the enzymatic reaction were compared to a standard log-based curve of citric acid concentrations to determine the concentration in supernatant.

#### **Acetoin and α-acetolactate measurements.**

Acetoin was measured by the Voges-Proskauer test adapted for microtiter plates essentially as described (70, 114). In order, 35 µL 0.5% (m/v) creatine (Sigma), 50 µL 5% (m/v) α-naphthol (Sigma), 50 µL 40% (v/v) KOH, and 50 µL *S. aureus* supernatant was added to each well. The reaction was incubated at room temperature for 15 min and absorbance was measured at OD<sub>560</sub>. Concentrations were calculated based on a linear standard curve. To quantify α-acetolactate, 5 µL 2M H<sub>2</sub>SO<sub>4</sub> was added to supernatant and incubated for 15 min at 60°C for decarboxylation of α-

acetolactate to acetoin before adding to the above reagents as described (115). Due to precipitation in the wells, each mixture was transferred to a new well before reading absorbance.

### **Quantification of 2,3 butanediol by mass spectrometry.**

Stock solution of 50 mM 2,3-butanediol (Sigma Aldrich) and calibration standards from 0 to 40  $\mu$ M were prepared in water. The isotopic standard (IS) solution of 5  $\mu$ M 2,3-butanediol (Toronto Research Chemicals) was prepared in water. 2,3-Butanediol in the samples were determined by LC-MS/MS after derivatization with trichloroacetyl isocyanate (Sigma Aldrich) according to Chen et al. (116) with slight modification. In a 1.5 mL plastic vial, 5  $\mu$ L of standard or sample was mixed with 5  $\mu$ L IS, 250  $\mu$ L acetonitrile and 20  $\mu$ L trichloroacetyl isocyanate. After 5 min, 250  $\mu$ L water was added to the vials and the mixture were analyzed by liquid chromatography-mass spectrometry LC-MS/MS. LC were performed with a Shimadzu 20AC-XR system with a 2.1 x 100 mm, Cortecs C8 column (Waters). Mobile phase A was 10 mM ammonium formate with 0.15% (v/v) formic acid in water and mobile phase B was methanol. The flow rate was 300  $\mu$ L $\cdot$ min<sup>-1</sup> and the injection volume was 5  $\mu$ L. 2,3-Butanediol was eluted from the column using a gradient (0-0.2 min/55% (v/v) B; 5 min/70% (v/v) B; 5.1-6 min/95% (v/v) B; 6.1-8 min/55% (v/v) B). MS/MS was performed with a TSQ Vantage triple quadrupole mass spectrometer (Thermo Fisher Scientific) operating in selected reaction monitoring mode with positive ionization. The derivatized peaks were detected using the following mass-to-charge ratio ( $m/z$ ) precursor > product ions: 2,3-butanediol (484 > 262); 2,3-butanediol-d8 (492 > 270). 2,3-Butanediol concentrations in the samples were determined by a linear calibration curve with 1/x weighting generated by the Thermo Xcalibur software. The curve was constructed by plotting the peak area ratios vs. standard concentrations. The peak area ratio was calculated by dividing the peak area of 2,3-butanediol by the peak area of the IS.

## Accession number(s).

The RNA-seq data have been deposited at NCBI Gene Expression Omnibus (GEO) (<https://www.ncbi.nlm.nih.gov/geo/>) under accession numbers GSE185963 and GSE186138.

## ACKNOWLEDGMENTS

We would like to acknowledge the Center for Cancer Research Genomics Core for RNA-sequencing, King Chan at the Protein Characterization Laboratory at Frederick National Laboratory for Cancer Research for quantifying 2,3-butanediol, the Cystic Fibrosis Foundation Isolate Core for providing clinical isolate strains, and the Dietrich lab (Columbia University) for providing the pSEK109 (pLD3208) plasmid. We thank Susan Gottesman, Kumaran Ramamurthi, Gisela Storz, and Saaed Tavazoie for comments on the manuscript, and members of the Gottesman, Ramamurthi, and Khare labs for discussion and feedback throughout this study. This work utilized the computational resources of the NIH High Performance Computing Biowulf cluster (<http://hpc.nih.gov>). Diagrams in Figures 1, 3, 5, and 8 were created with BioRender (<http://biorender.com>). This work was supported by the Intramural Research Program of the NIH, National Cancer Institute, Center for Cancer Research. TMZ was supported by a Postdoctoral Research Associate Training (PRAT) Fellowship award 1FI2GM137843-01 from the National Institute of General Medical Sciences.

## COMPETING INTERESTS

No competing interests declared.

# REFERENCES

1. Tavernier S, Crabbe A, Hacıoglu M, Stuer L, Henry S, Rigole P, Dhondt I, Coenye T. 2017. Community composition determines activity of antibiotics against multispecies biofilms. *Antimicrob Agents Chemother* 61:e00302–e00317.
2. Vandeplassche E, Tavernier S, Coenye T, Crabbe A. 2019. Influence of the lung microbiome on antibiotic susceptibility of cystic fibrosis pathogens. *Eur Respir Rev* 28:190041.
3. Little AE, Robinson CJ, Peterson SB, Raffa KF, Handelsman J. 2008. Rules of engagement: interspecies interactions that regulate microbial communities. *Annu Rev Microbiol* 62:375-401.
4. Khare A. 2021. Experimental systems biology approaches reveal interaction mechanisms in model multispecies communities. *Trends Microbiol* doi:10.1016/j.tim.2021.03.012.
5. Stubbendieck RM, Vargas-Bautista C, Straight PD. 2016. Bacterial communities: interactions to scale. *Front Microbiol* 7:1234.
6. Radlinski L, Rowe SE, Kartchner LB, Maile R, Cairns BA, Vitko NP, Gode CJ, Lachiewicz AM, Wolfgang MC, Conlon BP. 2017. *Pseudomonas aeruginosa* exoproducts determine antibiotic efficacy against *Staphylococcus aureus*. *PLoS Biol* 15:e2003981.
7. Dean SN, Chung MC, van Hoek ML. 2015. *Burkholderia* diffusible signal factor signals to *Francisella novicida* to disperse biofilm and increase siderophore production. *Appl Environ Microbiol* 81:7057-66.
8. Vega NM, Allison KR, Samuels AN, Klempner MS, Collins JJ. 2013. *Salmonella typhimurium* intercepts *Escherichia coli* signaling to enhance antibiotic tolerance. *Proc Natl Acad Sci U S A* 110:14420-5.
9. Hays EE, Wells IC, Katzman PA, Cain CK, Jacobs FA, Thayer SA, Doisy EA, Gaby WL, Roberts EC, Muir RD, Carroll CJ, Jones LR, Wade NJ. 1945. Antibiotic substances produced by *Pseudomonas-aeruginosa*. *J Biol Chem* 159:725-750.
10. Klumper U, Recker M, Zhang L, Yin X, Zhang T, Buckling A, Gaze WH. 2019. Selection for antimicrobial resistance is reduced when embedded in a natural microbial community. *ISME J* 13:2927-2937.
11. Liu W, Roder HL, Madsen JS, Bjarnsholt T, Sorensen SJ, Burmolle M. 2016. Interspecific bacterial interactions are reflected in multispecies biofilm spatial organization. *Front Microbiol* 7:1366.
12. Stacy A, Abraham N, Jorth P, Whiteley M. 2016. Microbial community composition impacts pathogen iron availability during polymicrobial infection. *PLoS Pathog* 12:e1006084.

- 745 13. Rosenthal AZ, Matson EG, Eldar A, Leadbetter JR. 2011. RNA-seq reveals cooperative  
746 metabolic interactions between two termite-gut spirochete species in co-culture. ISME J  
747 5:1133-42.
- 748 14. Hendrickson EL, Wang T, Dickinson BC, Whitmore SE, Wright CJ, Lamont RJ, Hackett  
749 M. 2012. Proteomics of *Streptococcus gordonii* within a model developing oral microbial  
750 community. BMC Microbiol 12:211.
- 751 15. McKenzie GJ, Harris RS, Lee PL, Rosenberg SM. 2000. The SOS response regulates  
752 adaptive mutation. Proc Natl Acad Sci U S A 97:6646-51.
- 753 16. Roncarati D, Scarlato V. 2017. Regulation of heat-shock genes in bacteria: from signal  
754 sensing to gene expression output. FEMS Microbiol Rev 41:549-574.
- 755 17. Amikam D, Galperin MY. 2006. PilZ domain is part of the bacterial c-di-GMP binding  
756 protein. Bioinformatics 22:3-6.
- 757 18. Keogh D, Tay WH, Ho YY, Dale JL, Chen S, Umashankar S, Williams RBH, Chen SL,  
758 Dunny GM, Kline KA. 2016. Enterococcal metabolite cues facilitate interspecies niche  
759 modulation and polymicrobial infection. Cell Host Microbe 20:493-503.
- 760 19. Lee N, Kim W, Chung J, Lee Y, Cho S, Jang KS, Kim SC, Palsson B, Cho BK. 2020.  
761 Iron competition triggers antibiotic biosynthesis in *Streptomyces coelicolor* during  
762 coculture with *Myxococcus xanthus*. ISME J 14:1111-1124.
- 763 20. Khare A, Tavazoie S. 2015. Multifactorial competition and resistance in a two-species  
764 bacterial system. PLoS Genet 11:e1005715.
- 765 21. Gjodsbol K, Christensen JJ, Karlsmark T, Jorgensen B, Klein BM, Krogfelt KA. 2006.  
766 Multiple bacterial species reside in chronic wounds: a longitudinal study. Int Wound J  
767 3:225-31.
- 768 22. Salsgiver EL, Fink AK, Knapp EA, LiPuma JJ, Olivier KN, Marshall BC, Saiman L. 2016.  
769 Changing epidemiology of the respiratory bacteriology of patients with cystic fibrosis.  
770 Chest 149:390-400.
- 771 23. Fischer AJ, Singh SB, LaMarche MM, Maakestad LJ, Kienenberger ZE, Pena TA, Stoltz  
772 DA, Limoli DH. 2021. Sustained coinfections with *Staphylococcus aureus* and  
773 *Pseudomonas aeruginosa* in cystic fibrosis. Am J Respir Crit Care Med 203:328-338.
- 774 24. Serra R, Grande R, Butrico L, Rossi A, Settimio UF, Caroleo B, Amato B, Gallelli L, de  
775 Francis S. 2015. Chronic wound infections: the role of *Pseudomonas aeruginosa* and  
776 *Staphylococcus aureus*. Expert Rev Anti Infect Ther 13:605-13.
- 777 25. Maliniak ML, Stecenko AA, McCarty NA. 2016. A longitudinal analysis of chronic MRSA  
778 and *Pseudomonas aeruginosa* co-infection in cystic fibrosis: a single-center study. J  
779 Cyst Fibros 15:350-6.
- 780 26. Cystic Fibrosis Foundation. 2018. Cystic Fibrosis Foundation patient registry 2018  
781 annual data report. Cystic Fibrosis Foundation, Bethesda, MD.,

- 782 27. Sagel SD, Gibson RL, Emerson J, McNamara S, Burns JL, Wagener JS, Ramsey BW,  
783 Inhaled Tobramycin in Young Children Study G, Cystic Fibrosis Foundation  
784 Therapeutics Development N. 2009. Impact of *Pseudomonas* and *Staphylococcus*  
785 infection on inflammation and clinical status in young children with cystic fibrosis. J  
786 Pediatr 154:183-8.
- 787 28. Nguyen AT, Oglesby-Sherrouse AG. 2016. Interactions between *Pseudomonas*  
788 *aeruginosa* and *Staphylococcus aureus* during co-cultivations and polymicrobial  
789 infections. Appl Microbiol Biotechnol 100:6141-8.
- 790 29. Hotterbeekx A, Kumar-Singh S, Goossens H, Malhotra-Kumar S. 2017. *In vivo* and *in*  
791 *vitro* interactions between *Pseudomonas aeruginosa* and *Staphylococcus* spp. Front Cell  
792 Infect Microbiol 7:106.
- 793 30. Magalhaes AP, Jorge P, Pereira MO. 2019. *Pseudomonas aeruginosa* and  
794 *Staphylococcus aureus* communication in biofilm infections: insights through network  
795 and database construction. Crit Rev Microbiol 45:712-728.
- 796 31. Yung DBY, Sircombe KJ, Pletzer D. 2021. Friends or enemies? The complicated  
797 relationship between *Pseudomonas aeruginosa* and *Staphylococcus aureus*. Mol  
798 Microbiol 116:1-15.
- 799 32. Nguyen AT, Jones JW, Ruge MA, Kane MA, Oglesby-Sherrouse AG. 2015. Iron  
800 depletion enhances production of antimicrobials by *Pseudomonas aeruginosa*. J  
801 Bacteriol 197:2265-75.
- 802 33. Noto MJ, Burns WJ, Beavers WN, Skaar EP. 2017. Mechanisms of pyocyanin toxicity  
803 and genetic determinants of resistance in *Staphylococcus aureus*. J Bacteriol 199.
- 804 34. Filkins LM, Graber JA, Olson DG, Dolben EL, Lynd LR, Bhujar S, O'Toole GA. 2015.  
805 Coculture of *Staphylococcus aureus* with *Pseudomonas aeruginosa* drives *S. aureus*  
806 towards fermentative metabolism and reduced viability in a cystic fibrosis model. J  
807 Bacteriol 197:2252-64.
- 808 35. Mashburn LM, Jett AM, Akins DR, Whiteley M. 2005. *Staphylococcus aureus* serves as  
809 an iron source for *Pseudomonas aeruginosa* during *in vivo* coculture. J Bacteriol  
810 187:554-66.
- 811 36. Korgaonkar AK, Whiteley M. 2011. *Pseudomonas aeruginosa* enhances production of  
812 an antimicrobial in response to *N*-acetylglucosamine and peptidoglycan. J Bacteriol  
813 193:909-17.
- 814 37. Korgaonkar A, Trivedi U, Rumbaugh KP, Whiteley M. 2013. Community surveillance  
815 enhances *Pseudomonas aeruginosa* virulence during polymicrobial infection. Proc Natl  
816 Acad Sci U S A 110:1059-64.
- 817 38. Yang N, Cao Q, Hu S, Xu C, Fan K, Chen F, Yang CG, Liang H, Wu M, Bae T, Lan L.  
818 2020. Alteration of protein homeostasis mediates the interaction of *Pseudomonas*  
819 *aeruginosa* with *Staphylococcus aureus*. Mol Microbiol 114:423-442.



- 820 39. Duan K, Dammel C, Stein J, Rabin H, Surette MG. 2003. Modulation of *Pseudomonas*  
821 *aeruginosa* gene expression by host microflora through interspecies communication. Mol  
822 Microbiol 50:1477-91.
- 823 40. Rezzonico F, Smits TH, Duffy B. 2012. Detection of AI-2 receptors in genomes of  
824 Enterobacteriaceae suggests a role of type-2 quorum sensing in closed ecosystems.  
825 Sensors (Basel) 12:6645-65.
- 826 41. Limoli DH, Warren EA, Yarrington KD, Donegan NP, Cheung AL, O'Toole GA. 2019.  
827 Interspecies interactions induce exploratory motility in *Pseudomonas aeruginosa*. Elife 8.
- 828 42. Pallett R, Leslie LJ, Lambert PA, Milic I, Devitt A, Marshall LJ. 2019. Anaerobiosis  
829 influences virulence properties of *Pseudomonas aeruginosa* cystic fibrosis isolates and  
830 the interaction with *Staphylococcus aureus*. Sci Rep 9:6748.
- 831 43. Camus L, Vandenesch F, Moreau K. 2021. From genotype to phenotype: adaptations of  
832 *Pseudomonas aeruginosa* to the cystic fibrosis environment. Microb Genom  
833 doi:10.1099/mgen.0.000513.
- 834 44. Pederick VG, Eijkelkamp BA, Begg SL, Ween MP, McAllister LJ, Paton JC, McDevitt CA.  
835 2015. ZnuA and zinc homeostasis in *Pseudomonas aeruginosa*. Sci Rep 5:13139.
- 836 45. Ochsner UA, Vasil ML. 1996. Gene repression by the ferric uptake regulator in  
837 *Pseudomonas aeruginosa*: cycle selection of iron-regulated genes. Proc Natl Acad Sci U  
838 S A 93:4409-14.
- 839 46. Ochsner UA, Wilderman PJ, Vasil AI, Vasil ML. 2002. GeneChip expression analysis of  
840 the iron starvation response in *Pseudomonas aeruginosa*: identification of novel  
841 pyoverdine biosynthesis genes. Mol Microbiol 45:1277-87.
- 842 47. Fey PD, Endres JL, Yajjala VK, Widhelm TJ, Boissy RJ, Bose JL, Bayles KW. 2013. A  
843 genetic resource for rapid and comprehensive phenotype screening of nonessential  
844 *Staphylococcus aureus* genes. MBio 4:e00537-12.
- 845 48. Ghssein G, Brutesco C, Ouerdane L, Fojcik C, Izaute A, Wang S, Hajjar C, Lobinski R,  
846 Lemaire D, Richaud P, Voulhoux R, Espallat A, Cava F, Pignol D, Borezee-Durant E,  
847 Arnoux P. 2016. Biosynthesis of a broad-spectrum nicotianamine-like metallophore in  
848 *Staphylococcus aureus*. Science 352:1105-9.
- 849 49. McFarlane JS, Lamb AL. 2017. Biosynthesis of an opine metallophore by *Pseudomonas*  
850 *aeruginosa*. Biochemistry 56:5967-5971.
- 851 50. Grim KP, San Francisco B, Radin JN, Brazel EB, Kelliher JL, Parraga Solorzano PK,  
852 Kim PC, McDevitt CA, Kehl-Fie TE. 2017. The metallophore staphylopin enables  
853 *Staphylococcus aureus* to compete with the host for zinc and overcome nutritional  
854 immunity. mBio 8.
- 855 51. Fojcik C, Arnoux P, Ouerdane L, Aigle M, Alfonsi L, Borezee-Durant E. 2018.  
856 Independent and cooperative regulation of staphylopin biosynthesis and trafficking by  
857 Fur and Zur. Mol Microbiol 108:159-177.



- 858 52. Lhospice S, Gomez NO, Ouerdane L, Brutesco C, Ghssein G, Hajjar C, Liratni A, Wang  
859 S, Richaud P, Bleves S, Ball G, Borezee-Durant E, Lobinski R, Pignol D, Arnoux P,  
860 Voulhoux R. 2017. *Pseudomonas aeruginosa* zinc uptake in chelating environment is  
861 primarily mediated by the metallophore pseudopaline. Sci Rep 7:17132.
- 862 53. McFarlane JS, Zhang J, Wang S, Lei X, Moran GR, Lamb AL. 2019. Staphylopine and  
863 pseudopaline dehydrogenase from bacterial pathogens catalyze reversible reactions and  
864 produce stereospecific metallophores. J Biol Chem 294:17988-18001.
- 865 54. Zhang J, Zhao T, Yang R, Siridechakorn I, Wang S, Guo Q, Bai Y, Shen HC, Lei X.  
866 2019. De novo synthesis, structural assignment and biological evaluation of  
867 pseudopaline, a metallophore produced by *Pseudomonas aeruginosa*. Chem Sci  
868 10:6635-6641.
- 869 55. Gomez NO, Tetard A, Ouerdane L, Laffont C, Brutesco C, Ball G, Lobinski R, Denis Y,  
870 Plesiat P, Llanes C, Arnoux P, Voulhoux R. 2020. Involvement of the *Pseudomonas*  
871 *aeruginosa* MexAB-OprM efflux pump in the secretion of the metallophore pseudopaline.  
872 Mol Microbiol doi:10.1111/mmi.14600.
- 873 56. Furman R, Biswas T, Danhart EM, Foster MP, Tsodikov OV, Artsimovitch I. 2013.  
874 DksA2, a zinc-independent structural analog of the transcription factor DksA. FEBS Lett  
875 587:614-9.
- 876 57. Wakeman CA, Moore JL, Noto MJ, Zhang Y, Singleton MD, Prentice BM, Gilston BA,  
877 Doster RS, Gaddy JA, Chazin WJ, Caprioli RM, Skaar EP. 2016. The innate immune  
878 protein calprotectin promotes *Pseudomonas aeruginosa* and *Staphylococcus aureus*  
879 interaction. Nat Commun 7:11951.
- 880 58. Vermilyea DM, Crocker AW, Gifford AH, Hogan DA. 2021. Calprotectin-mediated zinc  
881 chelation inhibits *Pseudomonas aeruginosa* protease activity in cystic fibrosis sputum. J  
882 Bacteriol 203:e0010021.
- 883 59. Marguerettaz M, Dieppois G, Que YA, Ducret V, Zuchuat S, Perron K. 2014. Sputum  
884 containing zinc enhances carbapenem resistance, biofilm formation and virulence of  
885 *Pseudomonas aeruginosa*. Microb Pathog 77:36-41.
- 886 60. Banin E, Vasil ML, Greenberg EP. 2005. Iron and *Pseudomonas aeruginosa* biofilm  
887 formation. Proc Natl Acad Sci U S A 102:11076-81.
- 888 61. Cuiv PO, Keogh D, Clarke P, O'Connell M. 2007. FoxB of *Pseudomonas aeruginosa*  
889 functions in the utilization of the xenosiderophores ferrichrome, ferrioxamine B, and  
890 schizokinen: evidence for transport redundancy at the inner membrane. J Bacteriol  
891 189:284-7.
- 892 62. O'May CY, Sanderson K, Roddam LF, Kirov SM, Reid DW. 2009. Iron-binding  
893 compounds impair *Pseudomonas aeruginosa* biofilm formation, especially under  
894 anaerobic conditions. J Med Microbiol 58:765-773.
- 895 63. Visca P, Bonchi C, Minandri F, Frangipani E, Imperi F. 2013. The dual personality of iron  
896 chelators: growth inhibitors or promoters? Antimicrob Agents Chemother 57:2432-3.

- 897 64. Tamber S, Maier E, Benz R, Hancock RE. 2007. Characterization of OpdH, a  
898 *Pseudomonas aeruginosa* porin involved in the uptake of tricarboxylates. J Bacteriol  
899 189:929-39.
- 900 65. Ashburner M, Ball CA, Blake JA, Botstein D, Butler H, Cherry JM, Davis AP, Dolinski K,  
901 Dwight SS, Eppig JT, Harris MA, Hill DP, Issel-Tarver L, Kasarskis A, Lewis S, Matese  
902 JC, Richardson JE, Ringwald M, Rubin GM, Sherlock G. 2000. Gene ontology: tool for  
903 the unification of biology. The Gene Ontology Consortium. Nat Genet 25:25-9.
- 904 66. Mi H, Muruganujan A, Ebert D, Huang X, Thomas PD. 2019. PANTHER version 14:  
905 more genomes, a new PANTHER GO-slim and improvements in enrichment analysis  
906 tools. Nucleic Acids Res 47:D419-D426.
- 907 67. Gene Ontology C. 2021. The Gene Ontology resource: enriching a GOld mine. Nucleic  
908 Acids Res 49:D325-D334.
- 909 68. Xiao Z, Xu P. 2007. Acetoin metabolism in bacteria. Crit Rev Microbiol 33:127-40.
- 910 69. Liu Q, Liu Y, Kang Z, Xiao D, Gao C, Xu P, Ma C. 2018. 2,3-Butanediol catabolism in  
911 *Pseudomonas aeruginosa* PAO1. Environ Microbiol 20:3927-3940.
- 912 70. Camus L, Briaud P, Bastien S, Elsen S, Doleans-Jordheim A, Vandenesch F, Moreau K.  
913 2020. Trophic cooperation promotes bacterial survival of *Staphylococcus aureus* and  
914 *Pseudomonas aeruginosa*. ISME J 14:3093-3105.
- 915 71. Blanusa M, Varnai VM, Piasek M, Kostial K. 2005. Chelators as antidotes of metal  
916 toxicity: therapeutic and experimental aspects. Curr Med Chem 12:2771-94.
- 917 72. Mastropasqua MC, Lamont I, Martin LW, Reid DW, D'Orazio M, Battistoni A. 2018.  
918 Efficient zinc uptake is critical for the ability of *Pseudomonas aeruginosa* to express  
919 virulence traits and colonize the human lung. J Trace Elem Med Biol 48:74-80.
- 920 73. Gray RD, Duncan A, Noble D, Imrie M, O'Reilly DS, Innes JA, Porteous DJ, Greening  
921 AP, Boyd AC. 2010. Sputum trace metals are biomarkers of inflammatory and  
922 suppurative lung disease. Chest 137:635-41.
- 923 74. Gonzalez MR, Ducret V, Leoni S, Perron K. 2019. *Pseudomonas aeruginosa* zinc  
924 homeostasis: Key issues for an opportunistic pathogen. Biochim Biophys Acta Gene  
925 Regul Mech 1862:722-733.
- 926 75. Conrady DG, Brescia CC, Horii K, Weiss AA, Hassett DJ, Herr AB. 2008. A zinc-  
927 dependent adhesion module is responsible for intercellular adhesion in staphylococcal  
928 biofilms. Proc Natl Acad Sci U S A 105:19456-61.
- 929 76. Ding Y, Fu Y, Lee JC, Hooper DC. 2012. *Staphylococcus aureus* NorD, a putative efflux  
930 pump coregulated with the Opp1 oligopeptide permease, contributes selectively to  
931 fitness *in vivo*. J Bacteriol 194:6586-93.
- 932 77. Formosa-Dague C, Speziale P, Foster TJ, Geoghegan JA, Dufrene YF. 2016. Zinc-  
933 dependent mechanical properties of *Staphylococcus aureus* biofilm-forming surface  
934 protein SasG. Proc Natl Acad Sci U S A 113:410-5.

- 935 78. Li K, Gifford AH, Hampton TH, O'Toole GA. 2020. Availability of zinc impacts interactions  
936 between *Streptococcus sanguinis* and *Pseudomonas aeruginosa* in coculture. J  
937 Bacteriol 202.
- 938 79. Rossi E, Falcone M, Molin S, Johansen HK. 2018. High-resolution in situ transcriptomics  
939 of *Pseudomonas aeruginosa* unveils genotype independent patho-phenotypes in cystic  
940 fibrosis lungs. Nat Commun 9:3459.
- 941 80. Cornforth DM, Dees JL, Ibberson CB, Huse HK, Mathiesen IH, Kirketerp-Moller K,  
942 Wolcott RD, Rumbaugh KP, Bjarnsholt T, Whiteley M. 2018. *Pseudomonas aeruginosa*  
943 transcriptome during human infection. Proc Natl Acad Sci U S A 115:E5125-E5134.
- 944 81. Kordes A, Preusse M, Willger SD, Braubach P, Jonigk D, Haverich A, Warnecke G,  
945 Haussler S. 2019. Genetically diverse *Pseudomonas aeruginosa* populations display  
946 similar transcriptomic profiles in a cystic fibrosis explanted lung. Nat Commun 10:3397.
- 947 82. Harrison F, Paul J, Massey RC, Buckling A. 2008. Interspecific competition and  
948 siderophore-mediated cooperation in *Pseudomonas aeruginosa*. ISME J 2:49-55.
- 949 83. Tognon M, Kohler T, Luscher A, van Delden C. 2019. Transcriptional profiling of  
950 *Pseudomonas aeruginosa* and *Staphylococcus aureus* during *in vitro* co-culture. BMC  
951 Genomics 20:30.
- 952 84. Barber MF, Elde NC. 2015. Buried treasure: evolutionary perspectives on microbial iron  
953 piracy. Trends Genet 31:627-636.
- 954 85. Farrand AJ, Reniere ML, Ingmer H, Frees D, Skaar EP. 2013. Regulation of host  
955 hemoglobin binding by the *Staphylococcus aureus* Clp proteolytic system. J Bacteriol  
956 195:5041-50.
- 957 86. Farrand AJ, Friedman DB, Reniere ML, Ingmer H, Frees D, Skaar EP. 2015. Proteomic  
958 analyses of iron-responsive, Clp-dependent changes in *Staphylococcus aureus*. Pathog  
959 Dis 73.
- 960 87. Pacheco AR, Moel M, Segre D. 2019. Costless metabolic secretions as drivers of  
961 interspecies interactions in microbial ecosystems. Nat Commun 10:103.
- 962 88. Taylor PK, Zhang L, Mah TF. 2019. Loss of the two-component system TctD-TctE in  
963 *Pseudomonas aeruginosa* affects biofilm formation and aminoglycoside susceptibility in  
964 response to citric acid. mSphere 4.
- 965 89. Dunphy LJ, Yen P, Papin JA. 2019. Integrated experimental and computational analyses  
966 reveal differential metabolic functionality in antibiotic-resistant *Pseudomonas*  
967 *aeruginosa*. Cell Syst 8:3-14 e3.
- 968 90. Dunphy LJ, Grimes KL, Wase N, Kolling GL, Papin JA. 2021. Untargeted metabolomics  
969 reveals species-specific metabolite production and shared nutrient consumption by  
970 *Pseudomonas aeruginosa* and *Staphylococcus aureus*. mSystems 6:e0048021.

971 91. Carvalho SM, de Jong A, Kloosterman TG, Kuipers OP, Saraiva LM. 2017. The  
972 *Staphylococcus aureus* alpha-acetolactate synthase ALS confers resistance to  
973 nitrosative stress. Front Microbiol 8:1273.

974 92. Mould DL, Botelho NJ, Hogan DA. 2020. Intraspecies signaling between common  
975 variants of *Pseudomonas aeruginosa* increases production of quorum-sensing-controlled  
976 virulence factors. mBio 11.

977 93. Marshall B, Stintzi A, Gilmour C, Meyer JM, Poole K. 2009. Citrate-mediated iron uptake  
978 in *Pseudomonas aeruginosa*: involvement of the citrate-inducible FecA receptor and the  
979 FeoB ferrous iron transporter. Microbiology (Reading) 155:305-315.

980 94. Ding Y, Liu X, Chen F, Di H, Xu B, Zhou L, Deng X, Wu M, Yang CG, Lan L. 2014.  
981 Metabolic sensor governing bacterial virulence in *Staphylococcus aureus*. Proc Natl  
982 Acad Sci U S A 111:E4981-90.

983 95. Li H, Li X, Wang Z, Fu Y, Ai Q, Dong Y, Yu J. 2015. Autoinducer-2 regulates  
984 *Pseudomonas aeruginosa* PAO1 biofilm formation and virulence production in a dose-  
985 dependent manner. BMC Microbiol 15:192.

986 96. Peters JM, Koo BM, Patino R, Heussler GE, Hearne CC, Qu J, Inclan YF, Hawkins JS,  
987 Lu CHS, Silvis MR, Harden MM, Osadnik H, Peters JE, Engel JN, Dutton RJ, Grossman  
988 AD, Gross CA, Rosenberg OS. 2019. Enabling genetic analysis of diverse bacteria with  
989 Mobile-CRISPRi. Nat Microbiol 4:244-250.

990 97. Jiang W, Oikonomou P, Tavazoie S. 2020. Comprehensive genome-wide perturbations  
991 via CRISPR adaptation reveal complex genetics of antibiotic sensitivity. Cell 180:1002-  
992 1017 e31.

993 98. Shiver AL, Culver R, Deutschbauer AM, Huang KC. 2021. Rapid ordering of barcoded  
994 transposon insertion libraries of anaerobic bacteria. Nat Protoc 16:3049-3071.

995 99. Rahme LG, Stevens EJ, Wolfort SF, Shao J, Tompkins RG, Ausubel FM. 1995.  
996 Common virulence factors for bacterial pathogenicity in plants and animals. Science  
997 268:1899-902.

998 100. Pardee AB, Jacob F, Monod J. 1959. Genetic control and cytoplasmic expression of  
999 inducibility in the synthesis of beta-galactosidase by *E-coli*. J Mol Biol 1:165-178.

1000 101. Martin M. 2011. Cutadapt removes adapter sequences from high-throughput sequencing  
1001 reads. EMBnet J 17:10-12.

1002 102. Bolger AM, Lohse M, Usadel B. 2014. Trimmomatic: a flexible trimmer for Illumina  
1003 sequence data. Bioinformatics 30:2114-20.

1004 103. McClure R, Balasubramanian D, Sun Y, Bobrovskyy M, Sumby P, Genco CA,  
1005 Vanderpool CK, Tjaden B. 2013. Computational analysis of bacterial RNA-Seq data.  
1006 Nucleic Acids Res 41:e140.

1007 104. Tjaden B. 2015. *De novo* assembly of bacterial transcriptomes from RNA-seq data.  
1008 Genome Biol 16:1.

1009 105. Tretyakov K. 2020. matplotlib\_venn, GitHub repository.

1010 106. Krassowski M. 2020. ComplexUpset doi:10.5281/zenodo.3700590.

1011 107. Wang B, Lin YC, Vasquez-Rifo A, Jo J, Price-Whelan A, McDonald ST, Brown LM,  
1012 Sieben C, Dietrich LEP. 2021. *Pseudomonas aeruginosa* PA14 produces R-bodies,  
1013 extendable protein polymers with roles in host colonization and virulence. Nat Commun  
1014 12:4613.

1015 108. Hoang TT, Karkhoff-Schweizer RR, Kutchma AJ, Schweizer HP. 1998. A broad-host-  
1016 range Flp-FRT recombination system for site-specific excision of chromosomally-located  
1017 DNA sequences: application for isolation of unmarked *Pseudomonas aeruginosa*  
1018 mutants. Gene 212:77-86.

1019 109. Elliott RP. 1958. Some properties of pyoverdine, the water-soluble fluorescent pigment  
1020 of the pseudomonads. Appl Microbiol 6:241-6.

1021 110. Winsor GL, Griffiths EJ, Lo R, Dhillon BK, Shay JA, Brinkman FS. 2016. Enhanced  
1022 annotations and features for comparing thousands of *Pseudomonas* genomes in the  
1023 *Pseudomonas* genome database. Nucleic Acids Res 44:D646-53.

1024 111. Fuchs S, Mehlan H, Bernhardt J, Hennig A, Michalik S, Surmann K, Pane-Farre J, Giese  
1025 A, Weiss S, Backert L, Herbig A, Nieselt K, Hecker M, Volker U, Mader U. 2018.  
1026 AureoWiki The repository of the *Staphylococcus aureus* research and annotation  
1027 community. Int J Med Microbiol 308:558-568.

1028 112. O'Toole GA. 2011. Microtiter dish biofilm formation assay. J Vis Exp doi:10.3791/2437.

1029 113. Himpsl SDM, E.L.T. 2019. Siderophore detection using chrome azurol S and cross-  
1030 feeding assays. In Pearson M (ed), *Proteus mirabilis*: Methods in Molecular Biology, vol  
1031 vol 2021. Humana, New York, NY.

1032 114. Nicholson WL. 2008. The *Bacillus subtilis* ydjL (*bdhA*) gene encodes acetoin  
1033 reductase/2,3-butanediol dehydrogenase. Appl Environ Microbiol 74:6832-8.

1034 115. Dorau R, Chen L, Liu J, Jensen PR, Solem C. 2019. Efficient production of alpha-  
1035 acetolactate by whole cell catalytic transformation of fermentation-derived pyruvate.  
1036 Microb Cell Fact 18:217.

1037 116. Chen J, Chen D, Zhang X, Wang M, Chen B, An D, Xu L, Lyu Q. 2018. Quantification of  
1038 alcohols, diols and glycerol in fermentation with an instantaneous derivatization using  
1039 trichloroacetyl isocyanate via liquid chromatography-massspectrometry. J Chromatogr  
1040 A 1568:22-28.

1041



# 1042 **FIGURES AND FIGURE LEGENDS**

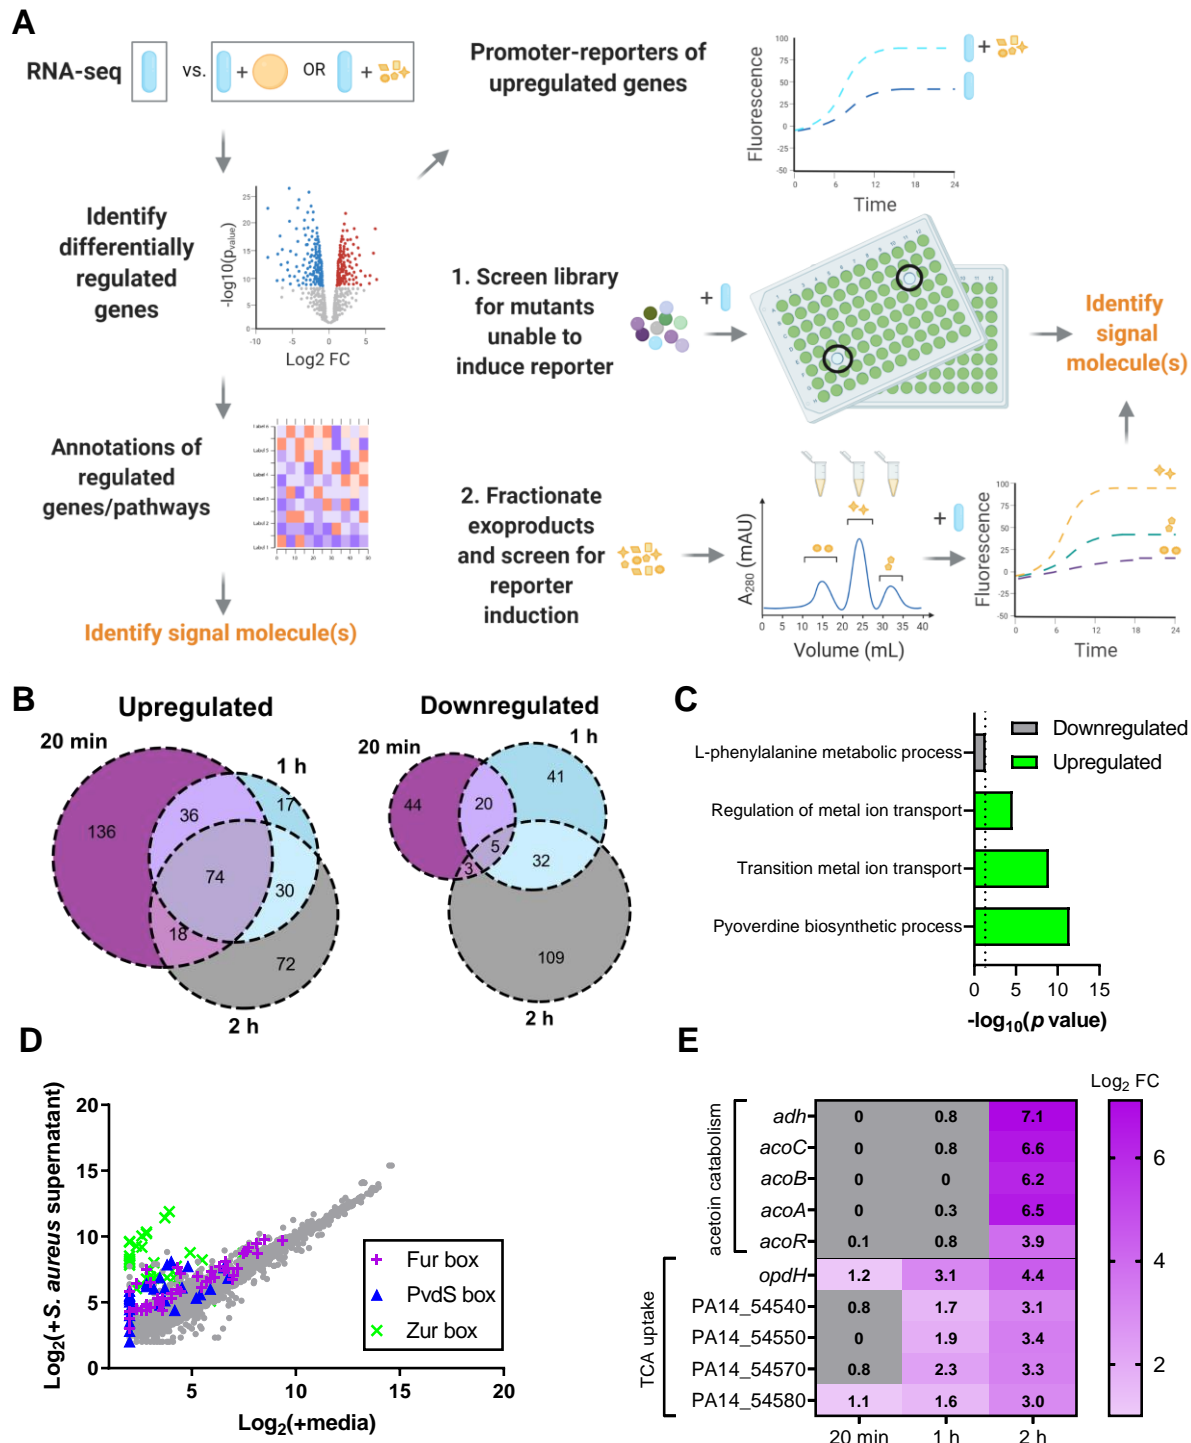

**FIGURE 1. *P. aeruginosa* differentially regulates metal deprivation and intermediate metabolite uptake pathways in the presence of *S. aureus* supernatant. (A) Schematic for**

identification of molecular mediators of interspecies sensing in a two-species system. Global transcriptional response of one species to another species, or its secreted exoproducts, compared to monocultures, is determined by RNA-seq. Analysis of the differentially regulated genes and pathways may be used to identify the signaling molecules that are sensed. Promoter-reporters are constructed from representative upregulated genes and used to screen for the signaling molecules by two complementary methods. In the first method, a mutant library is screened for mutants that disrupt production or export of the signaling molecules, and therefore have lower reporter expression. In the second, the supernatant is biochemically fractionated and fractions are screened for induction of the promoter. **(B)** Venn diagrams of upregulated and downregulated genes ( $\text{Log}_2$  fold change  $\geq 1$  or  $\leq -1$  and  $p < 0.05$  cutoff) in *P. aeruginosa* after *S. aureus* supernatant exposure compared to media control after 20 min, 1 h, and 2 h. **(C)** Gene ontology (GO) enrichment of differentially expressed genes in *P. aeruginosa* after 20 min (2). Non-redundant categories for downregulated and upregulated biological processes are shown. **(D)** Scatterplot of mean expression levels of transcripts after *S. aureus* supernatant exposure compared to media control after 20 min. Genes annotated previously in *P. aeruginosa* strain PAO1 as being regulated by Fur, PvdS (IS box), or Zur are shown (3, 4). **(E)**  $\text{Log}_2$  fold change of select transcripts in metabolite-uptake operons that increase in abundance over time.

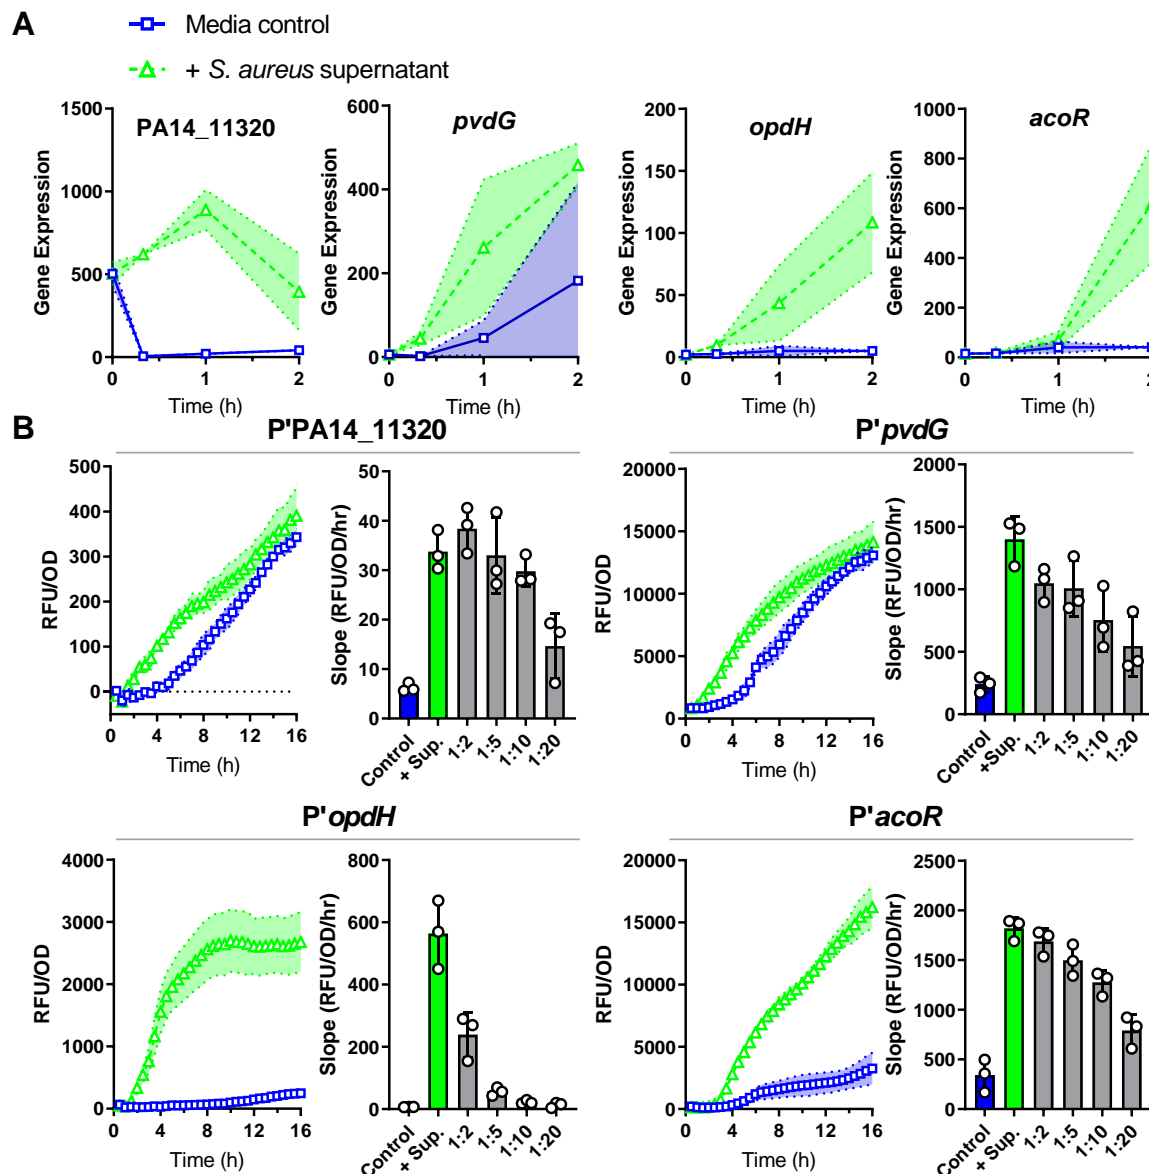

**FIGURE 2. *P. aeruginosa* promoter-reporters are induced by *S. aureus* exoproducts. (A)**

Expression levels from RNA-seq after exposure to *S. aureus* supernatant or media control for four transcripts as gene candidates for promoter-reporter construction. Gene annotations: PA14\_11320, Zur-regulon putative lipoprotein in operon with ABC transporter; *pvdG*, pyoverdine biosynthesis thioesterase; *opdH*, TCA uptake porin; *acoR*, transcriptional regulator of acetoin catabolism genes. **(B)** Relative fluorescence units (RFU) of mScarlet normalized to OD<sub>600</sub> over time after exposure to *S. aureus* supernatant or media control in the indicated promoter-reporter



1071 strains. Slope calculated from 1.5-5 h (promoters of PA14\_11320, *opdH*, and *acoR*) or 1-4 h  
 1072 (promoter of *pvdG*) after addition of supernatant, supernatant dilutions, or media control. Each  
 1073 strain had higher expression of mScarlet after supernatant addition compared with media control  
 1074 and displayed dose-dependent responses. Shaded regions and error bars show the standard  
 1075 deviation (SD).

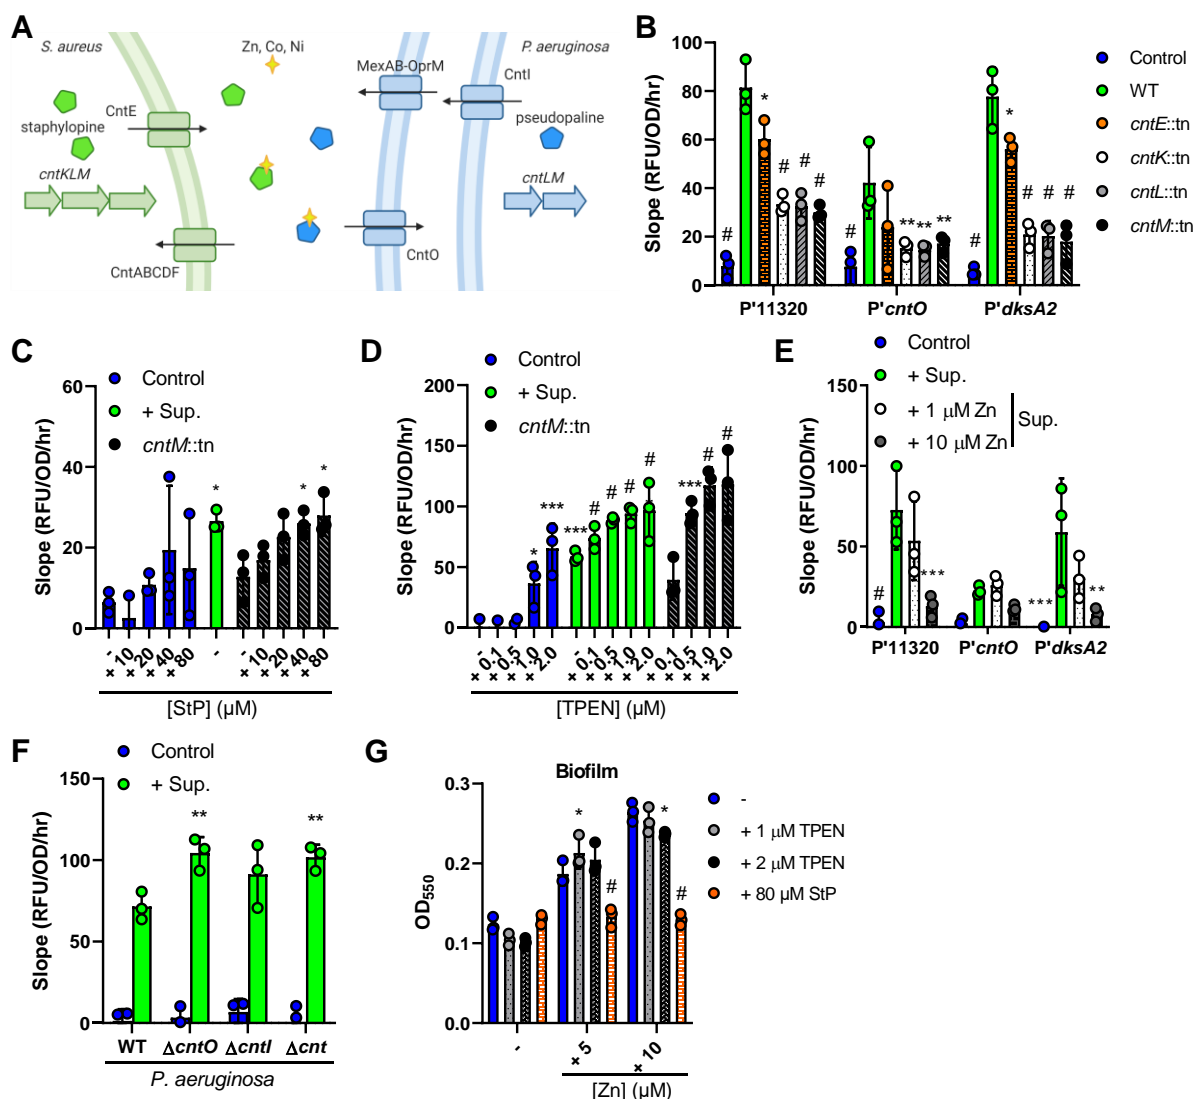

**FIGURE 3. The *S. aureus* metallophore staphylopin is sensed by *P. aeruginosa*.** (A) Screening of the NTML identified mutants in the biosynthesis and secretion of staphylopin (StP) as deficient in the induction of the PA14\_11320 promoter. Schematic shows StP (green pentagon) and pseudopaline (PsP) (blue pentagon) biosynthesis, export, binding to transition metals Zn, Co, Ni, and uptake. (B-F) RFU of mScarlet normalized to OD<sub>600</sub> over time from 1.5 to 5 h after exposure to media control or *S. aureus* WT or *cnt* supernatant and/or addition of the indicated concentrations of StP, Zn, or TPEN in the indicated *P. aeruginosa* WT or mutant promoter-

reporter strains. **(G)** *P. aeruginosa* cultures were grown in medium alone or with the additives listed, and biofilm formation was assessed by crystal violet staining after 24 h of growth. Data shown for all panels are the means of three independent biological replicates. Datasets were analyzed by two-way ANOVA with Tukey's test for multiple comparisons (significance shown for comparisons to: B, WT supernatant; F, respective WT sample, respectively) or one-way ANOVA with Dunnett's test for multiple comparisons to the respective control (E, WT supernatant; C, D, and G, media control). The error bars denote the SD. \*,  $p < 0.05$ ; \*\*,  $p < 0.01$ ; \*\*\*,  $p < 0.001$ ; #,  $p < 0.0001$ .

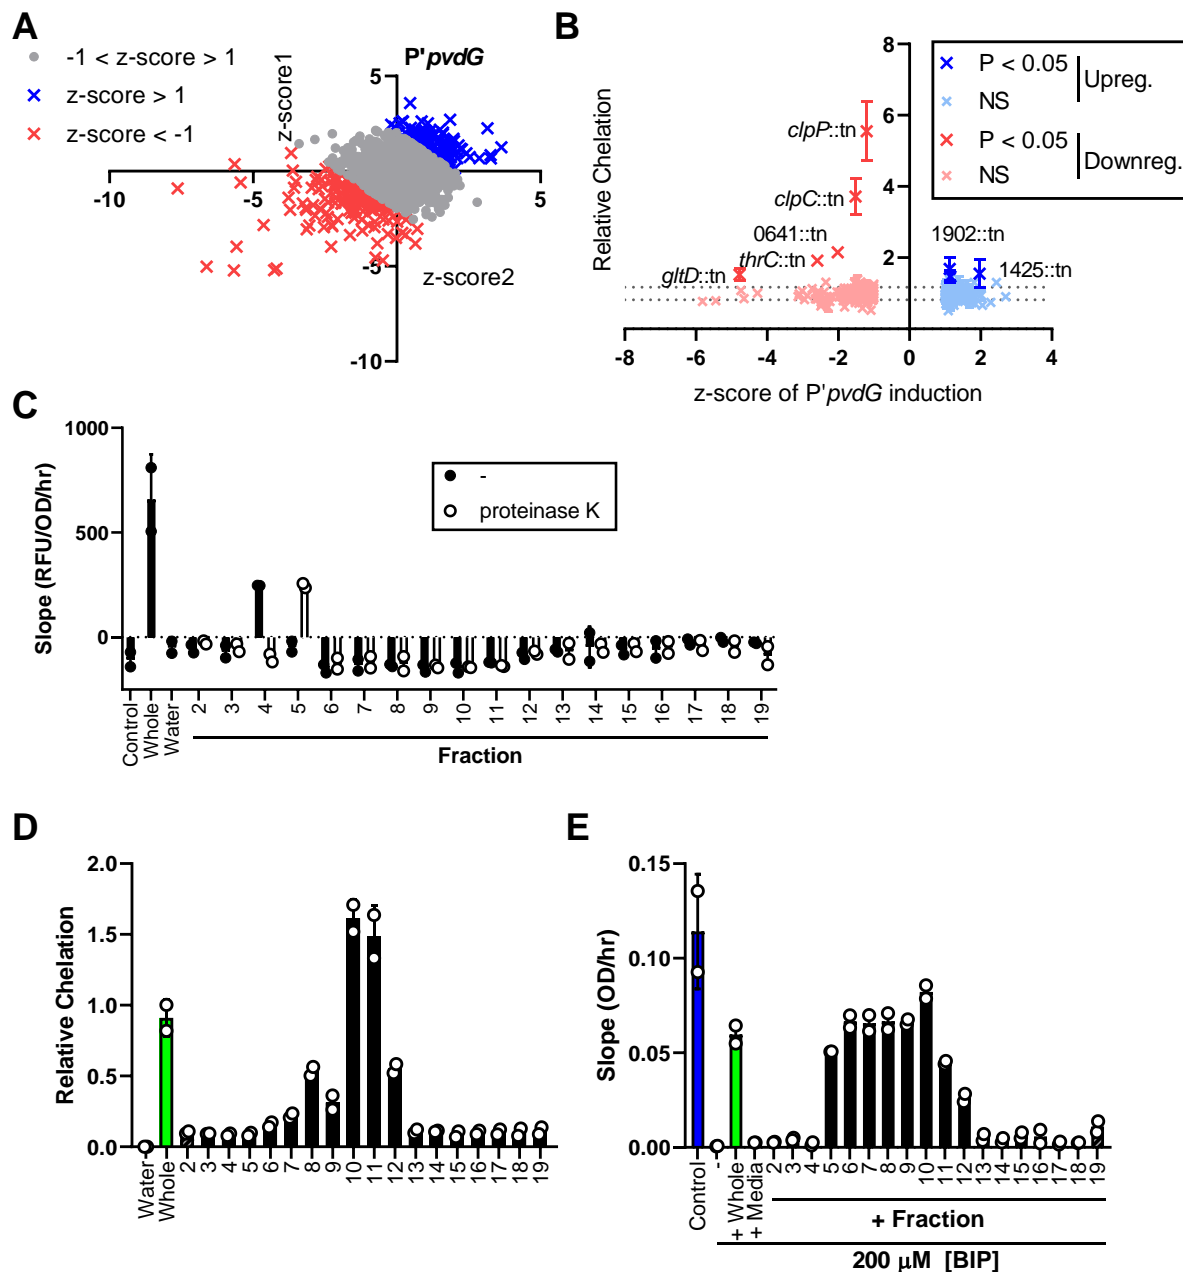

**FIGURE 4. *P. aeruginosa* pyoverdine promoter induction is affected by multiple *S. aureus* secreted factors.** (A) Transposon library screen with *P'pvdG*-reporter strain to determine mutations in *S. aureus* that increase or decrease induction in *P. aeruginosa*. For each mutant supernatant, the z-scores calculated from the mean slope (RFU/OD<sub>600</sub>/hr) of each respective experiment for two replicates of the screen are shown. (z-score < -1, downregulating, red; z-score

1099 > 1, upregulating, blue). **(B)** Relative chelation of the downregulating and upregulating  
1100 supernatants ( $r = -0.04$  for correlation between the relative chelation and the z-score). Data was  
1101 analyzed by one-way ANOVA with Dunnett's test for multiple comparisons to the WT control.  
1102 Supernatants with significantly different chelation compared to the WT control are labeled. Data  
1103 shown represent three independent replicates. **(C-E)** WT *S. aureus* supernatant was fractionated  
1104 by size-exclusion chromatography. Two independent biological replicates are shown. **(C)** RFU of  
1105 mScarlet normalized to OD<sub>600</sub> over time from 1 to 4 h after exposure to media control, 1X whole  
1106 *S. aureus* WT supernatant, water, or 10X fractions with or without proteinase K treatment (mixed  
1107 1:1 with medium). **(D)** Relative chelation of water control, whole supernatant, or 10X fractions. **(E)**  
1108 Slope of OD<sub>600</sub> over time from 1 to 8 h of *P. aeruginosa*  $\Delta pvdJ \Delta pchE$  strain in medium control or  
1109 medium with 200  $\mu$ M BIP with the addition of whole WT *S. aureus* supernatant, media, or 10X  
1110 fractions. Error bars denote the SD for panels B-E.

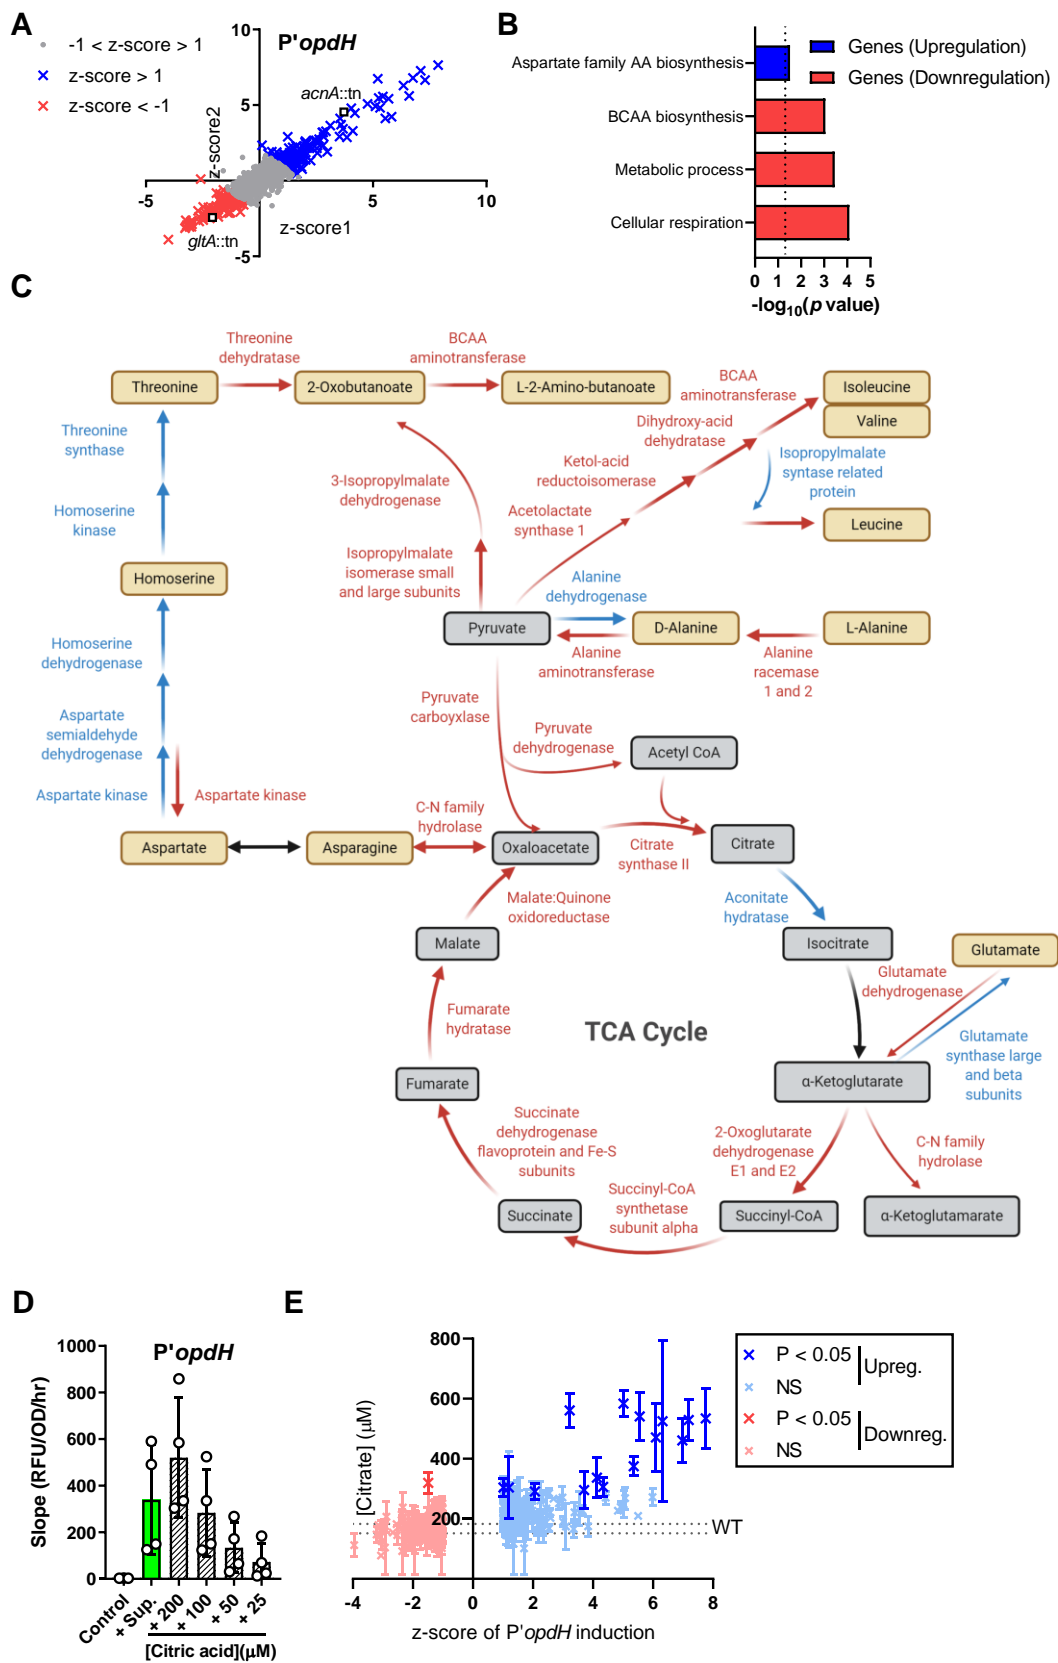

1112 **FIGURE 5. *S. aureus*-secreted citrate is sensed by *P. aeruginosa*.** (A) Transposon library  
 1113 screen with *P'opdH*-reporter strain to determine mutations in *S. aureus* that increase or decrease  
 1114 induction in *P. aeruginosa*. For each mutant supernatant, the z-scores calculated from the mean  
 1115 slope (RFU/OD<sub>600</sub>/hr) of each respective experiment for two replicates of the screen are shown  
 1116 (z-score < -1, downregulating, red; z-score > 1, upregulating, blue). (B) GO enrichment analysis  
 1117 of downregulating and upregulating mutants. (C) Enzymatic reactions in central metabolism are  
 1118 shown, with the colors representing the effect of the mutant supernatants on promoter induction  
 1119 (downregulating, red; upregulating, blue; mutant not in library and/or no change, black). (D) RFU  
 1120 of *P'opdH*-mScarlet normalized to OD<sub>600</sub> over time from 1.5 to 5 h after exposure to media control,  
 1121 *S. aureus* supernatant, or dilutions of citric acid. (E) Citric acid measurements of the  
 1122 downregulating and upregulating supernatants correlate to their induction of the *P'opdH* promoter  
 1123 ( $r = 0.6663$ ). Data was analyzed by one-way ANOVA with Dunnett's test for multiple comparisons  
 1124 to the WT control. Data shown represent three independent replicates for panels D-E. Error bars  
 1125 denote the SD for panels D-E.



1126

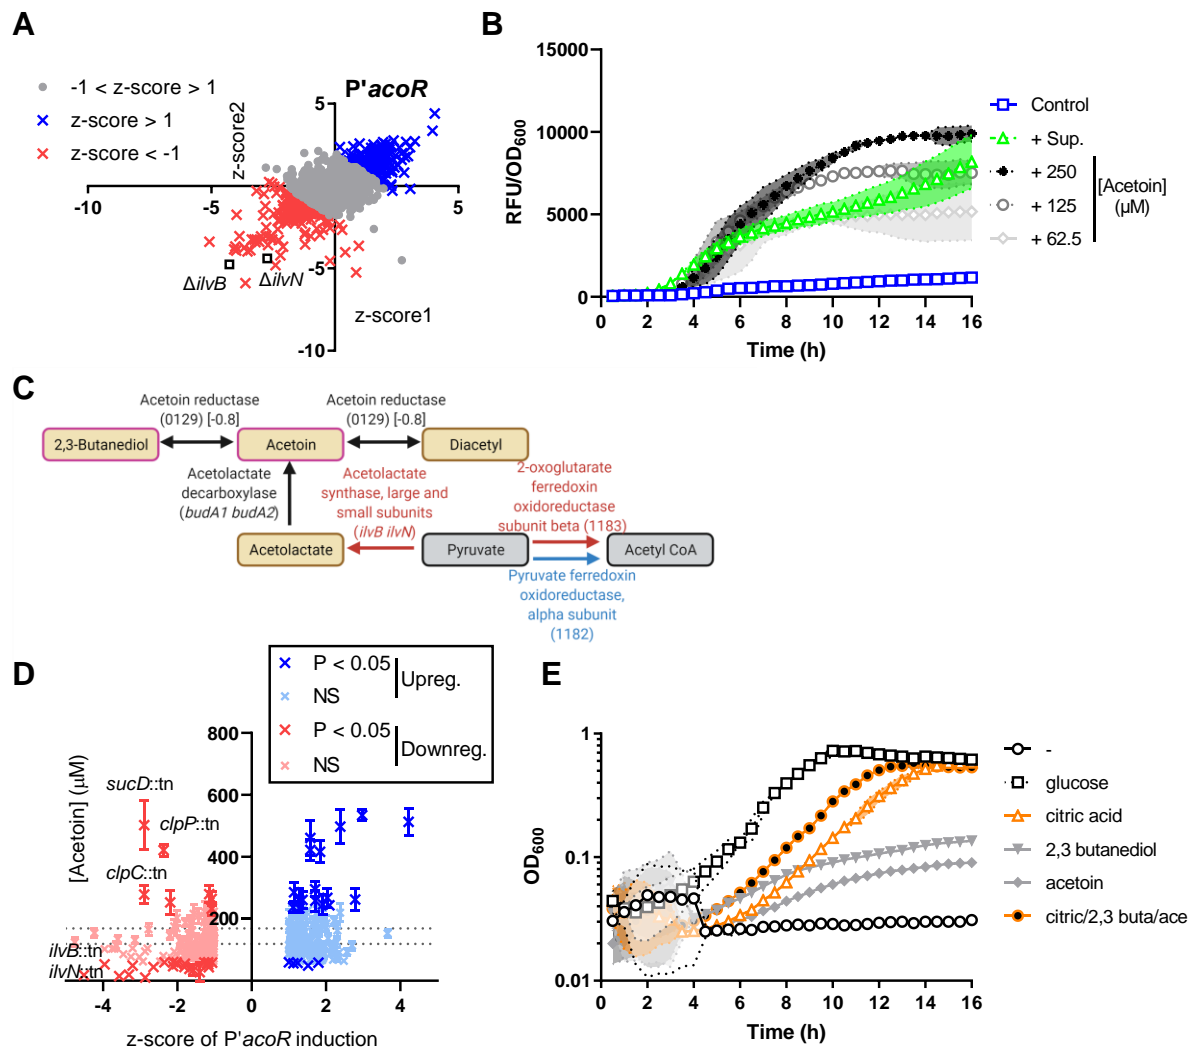

1127

1128 **FIGURE 6. Intermediate metabolites produced by *S. aureus* are sensed and utilized as**

1129 **carbon sources by *P. aeruginosa*. (A) Transposon library screen with P'acoR-reporter strain to**

1130 **determine mutations in *S. aureus* that increase or decrease induction in *P. aeruginosa*. For each**

1131 **mutant supernatant, the z-scores calculated from the mean slope (RFU/OD<sub>600</sub>/hr) of each**

1132 **respective experiment for two replicates of the screen are shown (z-score < -1, downregulating,**

1133 **red; z-score > 1, upregulating, blue). (B) RFU per OD<sub>600</sub> of P'acoR-mScarlet after addition of**

1134 **media, *S. aureus* supernatant, or the indicated concentrations of acetoin. (C) Enzymatic reactions**

1135 **of butanoate metabolism are shown, with the colors representing the effect of the mutant**

1136 supernatants on promoter induction (downregulating, red; upregulating, blue; mutant not in library  
 1137 and/or no change, black). **(D)** Acetoin measurements of the upregulating and downregulating  
 1138 supernatants correlate with *P'acoR* induction ( $r = 0.2157$ ). Acetoin concentration data was  
 1139 analyzed by one-way ANOVA with Dunnett's test for multiple comparisons to the WT control. For  
 1140 panels B and D, data shown represent three independent replicates and error bars denote the  
 1141 SD. **(E)** Growth of *P. aeruginosa* was monitored at OD<sub>600</sub> after the addition of 1 mM glucose, citric  
 1142 acid, 2,3-butanediol, acetoin, or a mix of citric acid, 2,3-butanediol, and acetoin as the sole carbon  
 1143 sources. Two independent replicates are shown. Shaded regions denote the SD.

1144

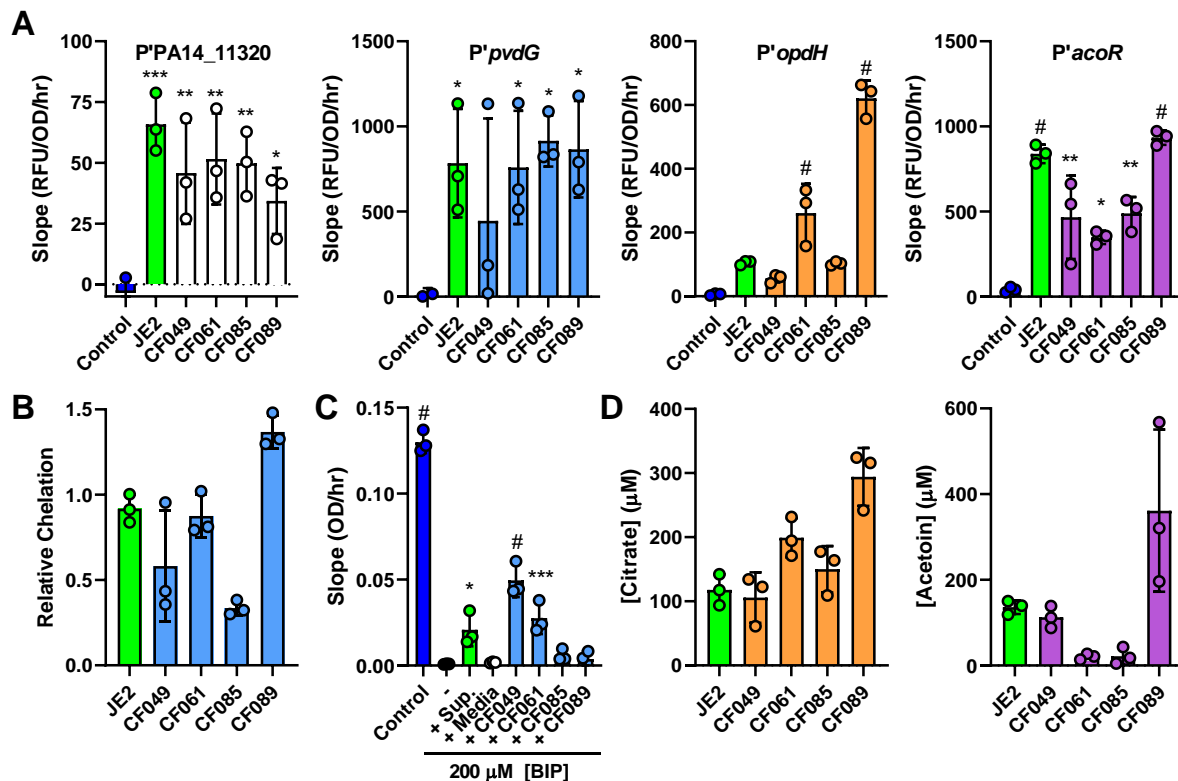

1145

**FIGURE 7. Sensed exoproducts are secreted by *S. aureus* clinical isolates. (A)** RFU of mScarlet normalized to OD<sub>600</sub> over time (promoter of PA14\_11320, *opdH*, and *acoR* calculated from 1.5 to 5 h; promoter of *pvdG* calculated from 1 to 4 h) of the indicated promoter-reporter strains after exposure to media control, or supernatants from *S. aureus* JE2 or clinical isolates CF049, CF061, CF085, and CF089. **(B)** Relative chelation of supernatants collected from *S. aureus* JE2 or the indicated clinical isolate. **(C)** Slope of OD<sub>600</sub> over time from 1 to 8 h of *P. aeruginosa*  $\Delta pvdJ \Delta pchE$  strain in medium control or medium with 200  $\mu$ M BIP with the addition of medium or supernatant from *S. aureus* JE2 or the indicated clinical isolate. **(D)** Citrate and acetoin measurements of supernatants collected from *S. aureus* JE2 or the indicated clinical isolates. For panels A and C, datasets were analyzed by one-way ANOVA with Dunnett's test for multiple comparisons to the media only control for A and no addition for C. Three independent

1157 replicates shown for all panels. Error bars denote the SD. \*,  $p < 0.05$ ; \*\*,  $p < 0.01$ ; \*\*\*,  $p < 0.001$ ; #,  
1158  $p < 0.0001$ .

1159

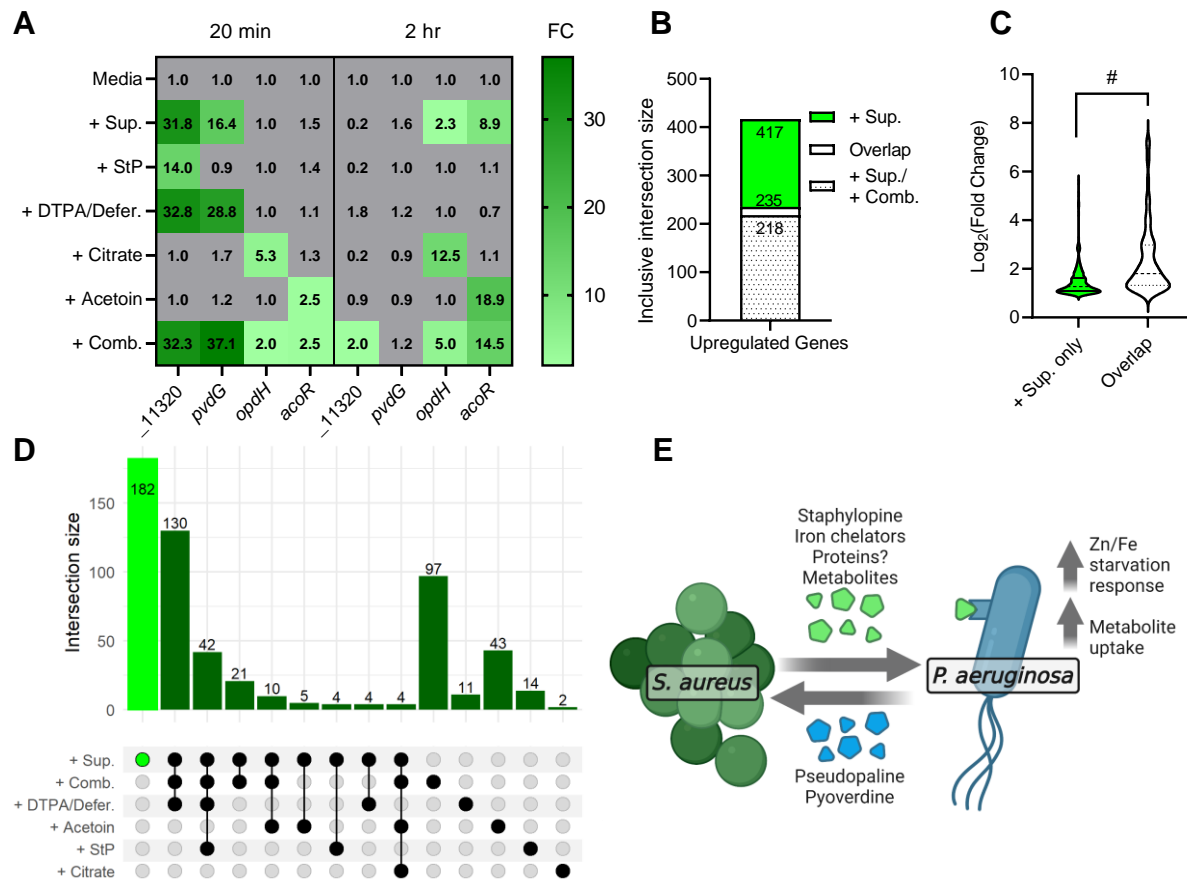

1160

1161 **FIGURE 8. Identified sensed products recapitulate a major part of the *P. aeruginosa***  
1162 **response to *S. aureus* supernatant. (A)** Heatmap of fold change of the transcripts PA14\_11320,  
1163 *pvdG*, *opdH*, and *acoR* after addition of *S. aureus* supernatant, the indicated molecules, or all  
1164 molecules in combination (+ Comb.) over media control, after 20 min or 2 h. **(B)** Inclusive  
1165 intersection of all upregulated genes after addition of supernatant (+ Sup.) vs. at least one other  
1166 condition (Overlap) or the combination of all molecules (+ Sup. / + Comb.). **(C)** Log<sub>2</sub> fold change  
1167 of the upregulated genes that are non-intersecting (+ Sup. only) or intersecting among  
1168 supernatant and at least one other condition (Overlap). Datasets were analyzed by a two-tailed *t*-  
1169 test. #, *p* < 0.0001. **(D)** UpSet plot of exclusive intersections of upregulating genes between  
1170 addition of *S. aureus* supernatant and the indicated molecules. (See Fig. S6 for full UpSet plot of

1171 all intersections.) **(E)** Model of *P. aeruginosa* sensing of *S. aureus* exoproducts. *S. aureus*  
 1172 secretes staphylopin, iron chelators, intermediate metabolites, and possibly proteinaceous  
 1173 molecules that are sensed by *P. aeruginosa*. In response, *P. aeruginosa* upregulates metal  
 1174 starvation and metabolite uptake pathways, which includes production of its own metal-binding  
 1175 molecules pseudopaline and pyoverdine.
